1 **Towards understanding biology of leydiogioma. G protein-coupled receptor and**  
2 **peroxisome proliferator-activated receptor crosstalk regulates lipid metabolism and**  
3 **steroidogenesis in Leydig cell tumors**

4 Malgorzata Kotula-Balak<sup>1§\*</sup>, Ewelina Gorowska-Wojtowicz<sup>1§</sup>, Agnieszka Milon<sup>1</sup>, Piotr  
5 Pawlicki<sup>1</sup>, Alicja Kaminska<sup>1</sup>, Laura Pardyak<sup>1</sup>, Wacław Tworzydło<sup>2</sup>, Bartosz J. Płachno<sup>3</sup>,  
6 Anna Hejmej<sup>1</sup>, Jan K. Wolski<sup>4</sup>

7  
8 <sup>1</sup>Department of Endocrinology, Institute of Zoology and Biomedical Research, Jagiellonian  
9 University in Krakow, Poland, Gronostajowa 9, 30-387 Krakow, Poland; <sup>2</sup>Developmental  
10 Biology and Invertebrate Morphology, <sup>3</sup>Department of Plant Cytology and Embryology,  
11 Institute of Botany, Jagiellonian University in Kraków, Poland, Gronostajowa 9, 30-387  
12 Krakow, Poland; <sup>4</sup>nOvum Fertility Clinic, Bociania 13, 02-807 Warszawa, Poland.

13  
14 § equal contribution

15  
16  
17 Correspondence to: \*

18  
19 e-mail: [malgorzata.kotula-balak@uj.edu.pl](mailto:malgorzata.kotula-balak@uj.edu.pl)  
20

21

22

23

24

25

26

27 **GPER-PPAR crosstalk and lipid metabolism in Leydig cell tumors**

28

29

30

## 31 **Abstract**

32 Leydig cell tumors (LCT) are the most common type of testicular sex cord-stromal tumor.  
33 In this report, we implicate the G-coupled estrogen receptor (GPER) and peroxisome  
34 proliferator receptor (PPAR) in regulation of lipid homeostasis and the expression of  
35 steroidogenesis-controlling molecules in clinical specimens of LCTs and cell line (mouse  
36 tumor Leydig cells; MA-10). We also show the general structure and morphology of human  
37 LCTs with the use of scanning electron microscopy and light microscopy, respectively. In  
38 LCTs, protein immunoblotting and immunohistochemical analysis revealed increased  
39 expression of GPER and decreased expression of PPAR $\alpha$ ,  $\beta$  and  $\gamma$ . Concomitantly, changes in  
40 expression pattern of the lutropin receptor (LHR), protein kinase A (PKA), perilipin (PLIN),  
41 hormone sensitive lipase (HSL), steroidogenic acute regulatory protein (StAR), translocator  
42 protein (TSPO), HMG-CoA synthase (HMGCA), and HMG-CoA reductase (HMGCR) were  
43 observed.

44 Using MA-10 cells treated with GPER and PPAR antagonists (alone and in combination),  
45 we demonstrated there is a GPER-PPAR mediated control of cholesterol concentration. In  
46 addition, GPER-PPAR $\alpha$  regulated estradiol secretion, while GPER-PPAR $\gamma$  affected cGMP  
47 concentration. It is assumed that GPER and PPAR can be altered in LCT, resulting in a  
48 perturbed lipid balance and steroidogenesis. In LCTs, the phosphatidylinositol-3-kinase  
49 (PI3K)-Akt-mTOR signaling pathway was disturbed. Thus, PI3K-Akt-mTOR, together with  
50 cGMP, can play a role in LCT proliferation, growth, and metastasis as well as lipid balance  
51 control.

52 In conclusion, we discuss the implications of GPER-PPAR interaction with lipid  
53 metabolism and steroidogenesis controlling-molecules in LCT biology that can be used in  
54 future studies as potential targets of diagnostic and therapeutic implementations.

55 **Key words:** G-coupled estrogen receptor; peroxisome proliferator-activated receptor; Leydig  
56 cell tumor; steroidogenesis-controlling molecules; ultrastructure

57

58

59

60

61

62

63

64

65

66

67

68

69

## 70 **Introduction**

71 Leydig cell tumor (LCT; leydigioma) is the most common non-germ cell gonadal tumor,  
72 accounting for 1-3% of all testicular tumors in adults and 4-9% in prepubertal children [1-3].

73 In recent years, a marked increase in the incidence of LCTs has been observed (14.7% of all  
74 testicular tumors removed). LCTs are usually benign tumors especially in infancy [4, 5],  
75 although local recurrence or metachronous tumors of the contralateral testis have also been  
76 described. Survival after diagnosis of primary LCTs ranged from 2 months to 17 years [6].  
77 Patients with LCTs usually have symptoms of testicular swelling [7] or various  
78 endocrinological disruptions [8]. Some patients have associated issues with endocrine  
79 symptoms e.g. gynecomastia and decreased libido. Gynecomastia is the main clinical  
80 manifestation in adults, but it may also be clinically significant in affected children who  
81 undergo precocious puberty [9]. In the latter, behavioral perturbations were observed [10].  
82 Some cases of LCTs were linked with increased plasma estradiol concentrations and were  
83 merely revealed by gynecomastia [11,12]. Moreover, infertility and azoospermia are not an  
84 unusual finding in patients with LCTs [13].  
85 Less than 0.2% of all testicular cancers were evidenced by metastatic spread. Besides  
86 retroperitoneal nodes, other metastatic sites are liver, lungs, bone, and mediastinum [14, 15].  
87 In prepubertal patients, even malignant LCTs are less likely to metastasize. Radical  
88 orchiectomy is the current standard of care but testis sparing surgery (TSS) (enucleation), in  
89 conjunction with intraoperative frozen section (FSE), has been recently attempted with  
90 promising results [16]. Prepubertal individuals and those with smaller tumors that lack  
91 evidence of malignancy are directly recommended for TSS.

92 The etiology of LCTs is unknown and appears heterogeneous. Furthermore, the molecular  
93 basis of LCTs is poorly understood. Some studies showed a possible role of genetic factors in  
94 LCT development. Interestingly, genetic mutations identified in children and adults were  
95 different and, in some cases, associated with other cancers [17]. In adults, it was observed that  
96 a somatic activating mutation in the guanine nucleotide-binding protein  $\alpha$  gene may result in  
97 tumor development, leading to overexpression of the inhibin  $\alpha$  subunit and hyperactivity of

98 sex steroid biosynthesis [5]. In addition, Carvajal-Carmona *et al.*, [18] reported an inherited  
99 fumarate hydratase mutation appears to cause tumor growth through activation of the hypoxia  
100 pathway. According to study of Lejeune *et al.*, [11] alterations in local stimuli, including  
101 Müllerian-inhibiting hormone, inhibin, growth factors, and temperature, may also create  
102 favorable conditions for initiation and development of LCTs.

103 Decreased Leydig cell function is common in men with reproductive disorders, including  
104 testicular dysgenesis syndrome (TDS). This syndrome is comprised of subfertility,  
105 cryptorchidism, hypospadias, and testicular cancer that is pathogenetically linked to impaired  
106 testis development and function [19, 20]. Leydig cell impairment manifests as a decreased  
107 testosterone/lutropin (LH) ratio and the presence of Leydig cell micronodules in the testis  
108 [21]. Additionally, uncontrolled synthesis and secretion of testosterone may suppress LH  
109 secretion and impair spermatogenesis [22]. The number and size of micronodules (clusters-  
110 when Leydig cell number >15) increases with the severity of TDS and increasing  
111 gonadotrophin levels [21, 23]. Due to ultrastructural changes demonstrated in Leydig cells  
112 within micronodules (decreased smooth endoplasmic reticulum, irregularly indented nuclear  
113 membrane, decreased lipofuscin pigment granules, and Reinke crystals) failure of their  
114 maturation is suggested [24, 25]. Also, the proportion of morphologically abnormal Leydig  
115 cells was inversely correlated with testosterone levels in patients with primary testicular  
116 disorders such as cryptorchidism, Klinefelter syndrome, and Del Castillo's syndrome [26].  
117 Besides micronodules, other histopathological changes of Leydig cells have been described.  
118 In patients with germ cell tumors, Leydig cell hypertrophy and hyperplasia were linked to  
119 elevated levels of chorionic gonadotropin [27]. In addition, various chemicals induce Leydig  
120 cell hyperplasia because of disruption of the hypothalamic-pituitary-axis [28]. Neoplastic  
121 proliferation of Leydig cells may result in the synthesis of non-functional steroid hormones.  
122 Alternatively, an excess of various hormones (*e.g.* estrogen, prolactin) produce elevated LH

123 levels that excessively stimulate steroidogenic Leydig cell function [29]. Concomitantly, in  
124 experimental studies of animals exposed to hormones, hormonally active chemicals, or other  
125 hormonal modulators, Leydig cell hypertrophy was demonstrated [30-33]. However, there is  
126 no evidence as to whether Leydig cell pathology including micronodules, hyperplasia, and/or  
127 hypertrophy may further develop into leydigioma [34].

128 Mitogenicity associated with estrogen receptor-mediated cellular events is believed to be  
129 the mechanism by which estrogens contribute to tumorigenesis. Currently, implications of  
130 estrogen signaling *via* canonical estrogen receptors (ERs), G-protein coupled membrane  
131 estrogen receptor (GPER), as well as estrogen-related receptors (ERRs) is recognized in  
132 animal and human Leydig cell tumorigenesis [35-37]. Until recently, the function of GPER in  
133 testicular cells was only partially known. In human testis, Fietz *et al.* [38, 39] showed high  
134 levels of GPER mRNA expression in Leydig cells. In fact, not only is GPER able to bind sex  
135 steroids but also binds the peroxisome proliferator-activated receptors (PPARs) [40]. In  
136 amphibians, rodents, and humans, three forms of PPAR have been described to date: PPAR $\alpha$ ,  
137 PPAR $\beta$  (also known as PPAR $\delta$ ), and PPAR $\gamma$  [41]. PPARs target genes that encode enzymes  
138 involved in peroxisome and mitochondria function as well as those of fatty acids,  
139 apolipoproteins, and lipoprotein lipase. Little is known about PPARs in the male reproductive  
140 system. In rat testis, PPARs are mainly expressed in Leydig and Sertoli cells [42]. It was  
141 shown that some PPAR chemicals alter testosterone production [43], and their long-term  
142 administration results in Leydig cell tumor development in rats [44, 45].

143 Scarce data are available on the molecular and biochemical characteristics of LCTs.  
144 Maintaining an adequate hormonal balance within the testis is the basis for proper gonadal  
145 function, thus playing a pivotal role for blocking hormone-secreting Leydig cell tumor  
146 development [46, 47]. Of note, in tumor cells, proliferation, growth, apoptosis, and  
147 communication are not only disturbed but other processes as well e.g. lipid metabolism [48].

148 It is worth noting that biosynthesis of sex steroids is multi-level, controlled process [49]. It  
149 requires the coordinated expression of number of genes, proteins of various function  
150 (receptors e.g. lutropin receptor; LHR, enzymes, transporters e.g. translocator protein; TSPO,  
151 steroidogenic acute regulatory protein; StAR, and regulators), signaling molecules (e.g.  
152 protein kinase A; PKA), and their regulators in response to LH stimulation. Moreover, for  
153 cellular steroidogenic function, global lipid homeostasis is crucial. Perilipin (PLIN), hormone  
154 sensitive lipase (HSL), and HMG-CoA synthase (HMGCS) and reductase (HMGCR) are  
155 members of a cell structural and enzymatic protein machinery controlling lipid homeostasis  
156 [50]. Activation of lipid metabolism is an early event in tumorigenesis, however, the precise  
157 expression pattern of lipid balance-controlling molecules and their molecular mechanism  
158 remains poorly characterized.

159 This study aims to determine the potential link between GPER and PPAR and whether  
160 this interaction regulates lipid homeostasis in LCTs. To further investigate the relationship of  
161 Leydig cell tumorigenesis to these receptors while elucidating the effects of their interactions  
162 mouse tumor Leydig cells (MA-10) were utilized.

## 163 **Materials and Methods**

### 164 *2.1. Tissue samples and ethical considerations*

165 Adult samples were residual tissues from testicular biopsy (microdissection TESE, by  
166 Schlegel, 1998) specimens collected at the nOvum Fertility Clinic, Warsaw, Poland from  
167 patients (31-45 year-old; n=24) diagnosed due to azoospermia (micronodules LCTs were  
168 recognized during surgery) after written informed consent according to the approval  
169 regulations by the National Commission of Bioethics at the Jagiellonian University in  
170 Krakow, Poland; permit no. 1072.6120.218.2017 and were carried out in accordance with the  
171 Declaration of Helsinki.

172 After evaluation by pathologists, the remaining tissue fragments were snap-frozen or fixed  
173 and paraffin-embedded, and stored at the Department of Endocrinology, Institute of Zoology  
174 and Biomedical Research, Jagiellonian University in Krakow, Poland.

175

## 176 **2.2. Cell culture and treatments**

177 The mouse Leydig cell line MA-10 was a generous gift from Dr. Mario Ascoli (University  
178 of Iowa, Iowa City, USA), and was maintained under standard technique [51]. Middle  
179 passages (p25-p28) of MA-10 cells were used for the study. The cells were grown in  
180 Waymouth's media (Gibco, Grand Island, NY) supplemented with 12% horse serum and 50  
181 mg/l of gentamicin at 37 °C in 5% CO<sub>2</sub>. Cells were plated overnight at a density of 1 × 10<sup>5</sup>  
182 cells/ml per well. Morphological and biochemical properties of MA-10 cells are regularly  
183 checked by microscopic observation, analysis of proliferation (TC20 Bio-Rad automated cell  
184 counter), mycoplasma detection (MycoFluor™ Mycoplasma Detection Kit; ThermoFisher  
185 Scientific), qRT-PCR analysis of characteristic genes and ELISA measurements of secretion  
186 products according to cell line authentication recommendations of the Global Bioresource  
187 Center (ATCC).

188 Twenty-four hours before the experiments, the medium was removed and replaced with a  
189 medium without phenol red supplemented with 5% dextran-coated, charcoal-treated FBS (5%  
190 DC-FBS) to exclude estrogenic effects caused by the medium. Next, cells were treated with  
191 selective antagonists: GPER [(3a*S*\*,4*R*\*,9*bR*\*)-4-(6-Bromo-1,3-benzodioxol-5-yl)-3a,4,5,9*b*-  
192 3*H*-cyclopenta[*c*]quinolone; G-15] (Tocris Bioscience, Bristol, UK), PPAR $\alpha$  [*N*-((2*S*)-2-  
193 (((1*Z*)-1-Methyl-3-oxo-3-(4-(trifluoromethyl)phenyl)prop-1-enyl)amino)-3-(4-(2-(5-methyl-2-  
194 phenyl-1,3-oxazol-4-yl)ethoxy)phenyl)propyl) propanamide, GW6471] or PPAR $\gamma$  [2-Chloro-  
195 5-nitro-*N*-4-pyridinylbenzamide, T0070907] freshly prepared as 100nM stock solutions in  
196 dimethyl sulfoxide (DMSO) (Sigma-Aldrich) and stored at -20°C. A stock concentrations



197 were subsequently dissolved in Waymouth's media to a final concentrations. Cells were  
198 treated with G-15, PPAR $\alpha$  or PPAR $\gamma$  alone or together for 24hours. Doses of G-15 (10nM),  
199 PPAR $\alpha$  (10 $\mu$ M) or PPAR $\gamma$  (10 $\mu$ M) [52]. Control cells were treated with DMSO (final conc.  
200 0.1%). Cell lysates and culture media were frozen in -20°C for further analyses.

201

### 202 **2.3. Scanning electron microscopy analysis**

203 LCTs were fixed in a mixture of 2.5% glutaraldehyde with 2.5% formaldehyde in a 0.05 M  
204 cacodylate buffer (Sigma; pH 7.2) for seven days, washed three times in a 0.1 M sodium  
205 cacodylate buffer and later dehydrated and subjected to critical-point drying. They were then  
206 sputter-coated with gold and examined at an accelerating voltage of 20 kV or 10 KV using a  
207 Hitachi S-4700 scanning electron microscope (Hitachi, Tokyo, Japan), which is housed in the  
208 Institute of Geological Sciences, Jagiellonian University in Kraków).

209

### 210 **2.4. Histology**

211 For routine histology, hematoxylin-eosin staining was performed on 4% paraformaldehyde  
212 LCT sections. As a control paraffin sections of human testis (cat. No. HP-401; Zyagen, San  
213 Diego, CA, USA) were used.

214

### 215 **2.5. RNA isolation, reverse transcription and real-time quantitative RT-PCR**

216 Total RNA was extracted from LCTs specimens and human Leydig cells (cat. no 10HU-  
217 103; ixCells Biotechnologies, San Diego CA, USA) using TRIzol® reagent (Life Technologies,  
218 Gaithersburg, MD, USA) according to the manufacturer's instructions. The yield and quality  
219 of the RNA were assessed using a NanoDrop ND2000 Spectrophotometer (Thermo Scientific,  
220 Wilmington, DE, USA). Samples with a 260/280 ratio of 1.95 or greater and a 260/230 ratio of  
221 2.0 or greater were used for analysis. Total cDNA was prepared using High-Capacity cDNA

222 Reverse Transcription Kit (Applied Biosystems, Carlsbad, CA, USA) according to the  
223 manufacturer's instructions.

224 The purified total RNA was used to generate total cDNA. A volume equivalent to 1 µg of total  
225 RNA was reverse transcribed using the High-Capacity cDNA Reverse Transcription Kit  
226 (Applied Biosystems, Carlsbad, CA, USA) according to the manufacturer's instructions. Total  
227 cDNA was prepared in a 20-µL volume using a random primer, dNTP mix, RNase inhibitor  
228 and reverse transcriptase (RT). Parallel reactions for each RNA sample were run in the absence  
229 of RT to assess genomic DNA contamination. RNase-free water was added in place of the RT  
230 product.

231 Real-time RT-PCR was performed using the StepOne Real-Time PCR system (Applied  
232 Biosystems) and optimized standard conditions as described previously by Kotula-Balak et al.  
233 [53, 54]. Based on the gene sequences in Ensembl database primer sets were designed using  
234 Primer3 software (Table, supplementary material). Selected primers were synthesized by  
235 Institute of Biochemistry and Biophysics, Polish Academy of Science (Warsaw, Poland).

236 To calculate the amplification efficiency serial cDNA dilution curves were produced for all  
237 genes. A graph of threshold cycle (Ct) versus log<sub>10</sub> relative copy number of the sample from a  
238 dilution series was produced. The slope of the curve was used to determine the amplification  
239 efficiency: %E =  $(10^{-1/\text{slope}} - 1) \times 100$ . All PCR assays displayed efficiency between 94% and  
240 104%.

241 Detection of amplification gene products was performed with 10 ng cDNA, 0.5 µM primers,  
242 and SYBR Green master mix (Applied Biosystems) in a final volume of 20 µL. Amplifications  
243 were performed as follows: 55 °C for 2 min, 94 °C for 10 min, followed by annealing  
244 temperature for 30 s (Table 1) and 45 s 72 °C to determine the cycle threshold (Ct) for  
245 quantitative measurement. To confirm amplification specificity, the PCR products from each

246 primer pair were subjected to melting curve analysis and subsequent agarose gel electrophoresis  
247 (not shown). In all real-time RT-PCR reactions, a negative control corresponding to RT reaction  
248 without the reverse transcriptase enzyme and a blank sample were carried out. All PCR products  
249 stained with Midori Green Stain (Nippon Genetics Europe GmbH, Düren, Germany) were run  
250 on agarose gels. Images were captured using a Bio-Rad Gel Doc XR System (Bio-Rad  
251 Laboratories, Hercules, CA, USA) (not shown). mRNA expressions were normalized to the  $\beta$ -  
252 *actin* mRNA (relative quantification, RQ = 1) with the use of the  $2^{-\Delta\Delta C_t}$  method.

253

## 254 **2.6. Western blotting**

255 For quantification of protein expression (Table 1) from LCTs proteins (as a control human  
256 Leydig cells; cat. No 10HU-103; ixCells Biotechnologies, San Diego CA, USA) were  
257 extracted in 50  $\mu$ l of radioimmunoprecipitation assay buffer (RIPA; Thermo Scientific, Inc.  
258 Rockford IL, USA) and protease inhibitor cocktail (Sigma Chemical Co., St. Louis, Missouri,  
259 USA). Concentration of proteins was determined with Bradford reagent (Bio-Rad Protein  
260 Assay; Bio-Rad Laboratories GmbH, Munchen, Germany), using bovine serum albumin as a  
261 standard. Aliquots (50  $\mu$ g protein) of cell lysates were used for electrophoresis on 12% mini  
262 gel by standard SDS-PAGE procedures and electrotransferred to polyvinylidene difluoride  
263 (PVDF) membranes (Millipore Corporate, MA, USA) by a semi-dry transfer cell (Bio-Rad).  
264 Then, blots were blocked with 5% nonfat dry milk in TBS, 0.1% Tween 20, overnight at 4 °C  
265 with shaking, followed by an incubation with respective antibodies (Table 1). The membranes  
266 were washed and incubated with a secondary antibody conjugated with the horseradish-  
267 peroxidase labeled goat anti-mouse or goat anti-rabbit IgGs (Vector Labs., Burlingame, CA,  
268 USA) at a dilution 1:1000, for 1 h at RT. Immunoreactive proteins were detected by  
269 chemiluminescence with Western Blotting Luminol Reagent (Santa Cruz Biotechnology), and  
270 images were captured with a ChemiDoc XRS + System (Bio-Rad Laboratories). All

271 immunoblots were stripped with stripping buffer containing 62.5 mM Tris-HCl, 100 mM 2-  
272 mercaptoethanol, and 2% SDS (pH 6.7) at 50 °C for 30 min and incubated in a rabbit  
273 polyclonal antibody against  $\beta$ -actin. Each data point was normalized against its corresponding  
274  $\beta$ -actin data point.

275 To obtain quantitative results, immunoblots were scanned with Image Lab 2.0 (Bio-Rad  
276 Laboratories). Then, a bound antibody was revealed using DAB as the substrate. Finally, the  
277 membranes were dried and then scanned using Epson Perfection Photo Scanner (Epson  
278 Corporation, CA, USA). Molecular masses were estimated by reference to standard proteins  
279 (Prestained SDS-PAGE Standards, Bio-Rad Labs, GmbH, Munchen, Germany). Quantitative  
280 analysis was performed for three separately repeated experiments using a public domain  
281 ImageJ software (National Institutes of Health, Bethesda, MD) as described elsewhere [55].  
282 The relative protein levels were expressed as arbitrary units.

283

## 284 **2.7. Immunohistochemistry**

285 To optimize immunohistochemical staining testis sections both control (Zyagen, San  
286 Diego, CA, USA) and LCTs sections were immersed in 10 mM citrate buffer (pH 6.0) and  
287 heated in a microwave oven ( $2 \times 5$  min, 700 W). Thereafter, sections were immersed  
288 sequentially in H<sub>2</sub>O<sub>2</sub> (3 %; v/v) for 10 min and normal goat serum (5 %; v/v) for 30 min  
289 which were used as blocking solutions. After overnight incubation at 4 °C with primary  
290 antibodies listed in Table 1. Next respective biotinylated antibodies (anti-rabbit and anti-  
291 mouse IgGs; 1: 400; Vector, Burlingame CA, USA) and avidin-biotinylated horseradish  
292 peroxidase complex (ABC/HRP; 1:100; Dako, Glostrup, Denmark) were applied in  
293 succession. Bound antibody was visualized with 3,3'-diaminobenzidine (DAB) (0.05 %; v/v;  
294 Sigma-Aldrich) as a chromogenic substrate. Control sections included omission of primary  
295 antibody and substitution by irrelevant IgG.

296

## 297 **2.8. Cholesterol assay**

298 The Amplex® Red Cholesterol Assay Kit (Molecular Probes Inc., Eugene, OR, USA) was  
299 used for cholesterol content ( $\mu\text{M}$ ) analysis in control and treated with GPER and PPAR (alone  
300 or in combinations) MA-10 cells. For measurement 100  $\mu\text{l}$  cell lysates was used according to  
301 manufacturer's protocol. Data were expressed as mean  $\pm$  SD. The fluorescence ( $\lambda = 580 \text{ nm}$ )  
302 was measured with the use of a fluorescence multiwell plate reader SPARK Tecan,  
303 Switzerland.

## 304 **2.9. cGMP concentration and estradiol secretion**

305 The production of cGMP in control and treated with GPER and PPAR (alone or in  
306 combinations) MA-10 cells was measured by General Cyclic guanosine monophosphate Elisa  
307 kit assay (EIAab Wuhan Eiaab Science Co., LTD, Wuhan, China) according to the  
308 manufacturer's instructions with detection level 0.31 to 20.0 ng/mL. The cGMP levels were  
309 calculated as ng/mL.

310 Estradiol Enzyme Immunoassay Kit (DRG, Inc. Int. Springfield, USA) was used for  
311 measurement of estradiol content in culture medium from control and treated with GPER and  
312 PPAR (alone or in combinations) MA-10 cells according to the manufacturer's instructions.  
313 The sensitivity of the assay was 10.6 pg/mL. The absorbance ( $\lambda = 450 \text{ nm}$ ) was measured.  
314 Data were expressed as mean  $\pm$  SD.

315 The measurements were performed with the use ELISA apparatus (Labtech LT-4500).

## 316 **2.10. Statistics**

317 Three biological repeats of each sample ( $n = 7$ ) and three independent experiments were  
318 performed. Each variable was tested using the Shapiro-Wilk W-test for normality. The  
319 homogeneity of variance was assessed with Levene's test. Comparisons were performed by  
320 one-way ANOVA, followed by Dunnett's post hoc test (GB-STAT software, v. 7.0; Dynamic  
321 Microsystems) to determine the significant differences between proteins expression levels,  
322 and cholesterol content, cGMP content and estradiol secretion. Statistical analyses were  
323 performed on raw data using Statistica 10 software (StatSoft Inc., Tulsa, OK, USA). Data  
324 were presented as means  $\pm$  S.D. Data were considered statistically significant at \*  $p < 0.05$ , \*\*  
325  $p < 0.01$  and \*\*\* $p < 0.001$ .

326

## 327 **Results**

### 328 **3.1. Scanning electron microscopic and morphological observations of LCTs**

329 Scanning electron microscopy analyses of LCT biopsy fragments revealed the tumors are  
330 relatively compact structures of oval or slightly elongated shape (Fig. 1a A-C) with tumor  
331 cells apposed and adhering to one another (Fig. 1a D, E). It is important to note that some  
332 tumor cells were fused. Our observations also revealed that compact areas of tumor cells are  
333 separated by deep grooves. Between those grooves, compact tumor sheets are formed (Fig. 1b  
334 E-G). Cells within sheets are tightly linked by thick projections and masses of such  
335 connections were observed between cells from neighboring tumor sheets (Fig. 1b E –F).  
336 Higher magnification revealed the presence of elongated, delicate filiform fibrillar projections  
337 that form a cage-like structure covering individual tumor sheets (Fig. 1b I – L).

338 Hematoxylin-eosin staining demonstrated a mixture of four types of cells in the tumor  
339 mass when compared to controls, where single or small groups of Leydig cells were seen in  
340 the interstitial space (Fig. 2 A, B). In LCTs, most cells possessed a large polygonal shape with

341 abundant cytoplasm, indistinct cell borders, and regular round to oval nuclei. The nucleus was  
342 found to be frequently prominent (Fig. 2b). Occasionally, cells as those noted above were  
343 found to possess distinct cell borders and smaller nuclei (Fig. 2b'). Small cells with scant,  
344 densely eosinophilic cytoplasm and a grooved nuclei (Fig. 2b'') and spindle-shaped  
345 (sarcomatoid) cells (Fig. 2b''') were observed as well.

346

### 347 ***3.2. Expression and localization of GPER and PPARs in LCTs***

348

349 In LCTs, increased expression of GPER ( $p < 0.05$ ) and decreased expression of PPAR $\alpha$   
350 ( $p < 0.001$ ), PPAR $\beta$  ( $p < 0.01$ ), and PPAR $\gamma$  ( $p < 0.001$ ) was seen when compared to controls  
351 (Fig.3A, B). Corresponding to GPER and PPARs protein expression changes their mRNA  
352 expressions in LCTs are presented as supplementary material (Fig.3').

353 No changes in GPER localization and staining intensity was found in control Leydig cells  
354 and LCTs (Fig.4 A, A'). Specifically, the staining was exclusively cytoplasmic and of  
355 moderate intensity. Localization and immunostaining intensity of PPAR varied between  
356 Leydig cells of control testis and LCTs (Fig.4B, B', C, C', D, D'). While strong cytoplasmic-  
357 nuclear expression of PPAR $\alpha$ ,  $\beta$ , and  $\gamma$  was found in control samples, an absence of PPAR $\alpha$   
358 expression and moderate to weak immunostaining expression of PPAR $\beta$  and PPAR $\gamma$ ,  
359 respectively, were detected. In LCTs, PPARs were located primarily in the cytoplasm of  
360 Leydig cells. No positive staining was found when primary antibodies were omitted (Fig. 4,  
361 inserts at A, D').

362

### 363 ***3.3. Expression and localization of LHR, PKA, PLIN, HSL, StAR, TSPO, HMGCS and***

#### 364 ***HMGCR in LCTs***

365

366 In LCTs, varying expression of LHR, PKA, PLIN, HSL, StAR, TSPO, HMGCS, and  
367 HMGCR was observed when compared to normal Leydig cells (Fig. 5A, B). The expression  
368 of LHR and PKA was increased ( $p < 0.05$  and  $p < 0.01$ , respectively) as well as that of  
369 HMGCS and HMGCR ( $p < 0.001$  and  $p < 0.05$ , respectively). In contrast, PLIN and StAR  
370 expression was decreased ( $p < 0.001$  and  $p < 0.05$ , respectively), while a non-significant  
371 increase was observed for HSL and TSPO. Corresponding to LHR, PKA, PLIN, HSL, StAR,  
372 TSPO, HMGCS, and HMGCR protein expression changes their mRNA expressions in LCTs  
373 are presented as supplementary material (Fig.5').

374 In control Leydig cells and LCTs, cytoplasmic expression of LHR was found (Fig.6 A, A').  
375 The immunostaining was of moderate intensity in control Leydig cells but was weak and  
376 present in minority of cells of LCTs. No differences were found in PKA distribution and  
377 immunostaining (Fig. 6 B, B'), with strong staining present in control and tumor Leydig cell  
378 cytoplasm. PLIN distribution was cytoplasmic in control Leydig cells and LCTs (Fig. 6 C,  
379 C'). In control Leydig cells, staining intensity was strong while found to be weak in LCTs.  
380 Increased HSL staining intensity was found in LCTs when compared to control cells (Fig. 6D,  
381 D') and was exclusively cytoplasmic. Strong immunoreaction was found in the blood vessel  
382 epithelium. In contrast, decreased staining intensity of StAR, exclusively present in the  
383 cytoplasm, was observed in LCTs (Fig. 6E, E') while control Leydig cells exhibited moderate  
384 cytoplasmic staining. A similar pattern was found for TSPO (Fig. 6 F, F'). Moderate  
385 cytoplasmic expression was revealed in control Leydig cell cytoplasm, while the TSPO  
386 staining intensity was very weak in LCTs. However, in a few cells immunoreaction was very  
387 strong. No differences were found in the distribution of HMGCS and HMGCR between  
388 control cells and LCTs (Fig. 6 G, G' and H, H'). Strong cytoplasmic expression of HMGCS  
389 and moderate cytoplasmic expression of HMGCR were revealed in control Leydig cells and



390 LCTs, respectively. No positive staining was found when primary antibodies were omitted  
391 (Fig. 4, inserts at A, F').

392

### 393 ***3.4. Effect of GPER and PPAR blockage on expression of PI3K, Akt and mTOR in LCTs***

394 In LCTs, PI3K and Akt expression was increased ( $p < 0.05$ .) while no observable changes  
395 in mTOR expression was found when compared to controls (Fig. 5A, B).

396

### 397 ***3.5. Effect of GPER and PPAR blockage on cholesterol concentration, estradiol secretion 398 and cGMP concentration in MA-10 cells***

399 Regardless of used antagonists (alone or in combination), an increased ( $p < 0.05$ ,  $p < 0.01$ )  
400 cholesterol concentration in tumor Leydig cells was seen (Fig. 8A). Secretion of estradiol  
401 markedly increased ( $p < 0.001$ ) after GPER blockage (Fig. 8B). A similar increase ( $p < 0.01$ )  
402 was observed after GPER and PPAR $\alpha$  blockage. Conversely, blockage of GPER and PPAR $\gamma$   
403 decreased ( $p < 0.05$ ) estradiol secretion. When either PPAR $\alpha$  or PPAR $\gamma$  was blocked, no to  
404 little alterations ( $p < 0.05$ ) in hormone secretion were revealed.

405 Changes in cGMP concentration after antagonist-treatment were similar to those of  
406 estradiol secretion (Fig. 8C). Treatment with a GPER antagonist, alone or in combination with  
407 a PPAR $\alpha$  antagonist, increased ( $p < 0.05$ ,  $p < 0.01$ ) cGMP concentration while treatment with  
408 PPAR $\alpha$  or  $\gamma$  antagonists consistently decreased ( $p < 0.05$ ) the concentration. Only treatment  
409 with GPER and PPAR $\gamma$  antagonists in combination increased ( $p < 0.01$ ) cGMP concentration.

410

## 411 **Discussion**

412 In the present study, we examined the cellular organization and molecular mechanisms,  
413 including GPER and PPAR signaling, lipid balance, and steroidogenesis-regulating molecular  
414 interactions that regulate LCT biology.

415 For the first time, scanning electron microscopic analysis was used to visualize the general  
416 organization of LCTs. We showed a complicated LCT structure where individual cells were  
417 not recognized in the solid mass, but a number of prolongations of various size were formed,  
418 keeping cells tightly linked to each other. Of note, according to Kim *et al.*, [14] and Al-Agha  
419 and Axiotis [56], benign LCTs classically present as a small (3–5 cm in diameter), sharply  
420 delineated and solid mass embedded within the testis. Alternatively, malignant LCTs are  
421 typically larger (greater than 5 cm in diameter), have infiltrative margins, and show areas of  
422 hemorrhage and necrosis. They replace the testis and/or extend beyond testicular  
423 parenchyma. Morphologically, LCTs can consist predominantly of one type or as a mixture of  
424 the four types of cells [57] observed in specimens examined herein. Pale to clear cytoplasm of  
425 LCTs, related to abundant lipid accumulation, was reported by Al-Agha and Axiotis [56].  
426 Other characteristic frequently observed is a rich cytoplasmic lipofuscin pigment that is  
427 distinctive for LCT, although it is present in other steroid hormones-secreting tumors as well  
428 as in aging cells [3]. Additionally, Reinke crystals, both intracytoplasmic and intranuclear, are  
429 often described in LCTs. Ultrastructural studies of LCTs revealed organelle content typical  
430 for steroid-secreting cells e.g. abundant smooth endoplasmic reticulum, mitochondria with  
431 tubulovesicular cristae, and numerous lipid droplets or irregularly shaped electron-dense  
432 bodies consisting of lipid droplets and accumulated in lysosomes [58].

433 Leydig cell tumors are sex steroid hormone-secreting tumors with androgens produced in  
434 prepubertal children and estrogens in adults [10]. A central factor in LCT growth and  
435 progression is represented by an inadequate intratesticular balance in the androgen/estrogen  
436 ratio [59]. Sirianni *et al.*, [60] demonstrated that estrogens elicit proliferative effects in human  
437 and rodent tumor Leydig cells through an autocrine mechanism. Findings from transgenic  
438 mice revealed an increased estrogen/androgen ratio, and estrogen excess resulted in Leydig  
439 cell hyperplasia, hypertrophy, and adenomas [61]. Of note, these effects can be induced by the

440 action of estrogen *via* canonical estrogen receptors. Varying expression patterns of ER $\alpha$  and  
441 ER $\beta$  were observed in human LCTs compared to healthy testis [36]. Also, in human and rat  
442 LCTs, involvement of GPER in cell proliferation, growth, and apoptosis was shown [62].  
443 Rago *et al.*, [63, 64] confirmed the presence of GPER in germ cell tumors and sex-cord  
444 stromal tumors. From the latter group, in LCTs, the authors found no differences in GPER  
445 expression in relation to normal testis. In contrast, we revealed an increase in GPER  
446 expression in LCTs when compared to normal Leydig cells. Moreover, in preliminary *in vitro*  
447 experiments in mouse tumor Leydig cells, GPER expression was increased [54].

448       Herein, we showed GPER, alone and together with PPAR $\alpha$ , effected estradiol secretion  
449 by tumor Leydig cells, although GPER and PPAR increased cholesterol levels in these cells.  
450 Such results indicate a leading role of GPER over PPAR in regulation of sex hormone  
451 production and secretion, and it suggests possible GPER and PPAR $\alpha$  alterations in LCTs.  
452 Similarly, our prior study also showed progesterone secretion modulation in GPER and PPAR  
453 antagonists-treated tumor mouse Leydig cells [52]. According to findings by Chimento *et al.*,  
454 [62], GPER is a good target for reduction of tumor Leydig cell proliferation. In tumor rat  
455 Leydig cells (R2C), GPER activation by its agonist (G-1) was associated with the initiation of  
456 the intrinsic apoptotic mechanism. Other experimental studies showed that endocrine  
457 disrupting chemicals, acting through GPER signaling, are involved in testicular germ cell  
458 carcinogenesis [37].

459       Interestingly, androgens have been shown to inhibit tumor Leydig cell proliferation by  
460 opposition to self-sufficient *in situ* estrogen production in R2C cells [46]. Androgen treatment  
461 significantly decreased the expression and activity of estrogen synthase (aromatase). This  
462 inhibitory effect relied on androgen receptor (AR) activation and involved negative regulation  
463 of the aromatase gene (*CYP19*) transcriptional activity through the nuclear orphan receptor  
464 DAX-1 (dosage-sensitive sex reversal, adrenal hypoplasia critical region, on chromosome X,

465 gene 1). Alternatively, the negative role of anabolic androgenic steroids in supraphysiologic  
466 dosage was recently implicated in mechanisms of tumorigenesis *via* impairment of the  
467 expression of steroidogenic enzymes and effects on intratesticular hormonal balance [65]. Of  
468 note, male patients with congenital adrenal hyperplasia (CAH) can develop bilateral testicular  
469 adrenal rest tumors (TARTs). These tumors, in most cases, regress with glucocorticoid  
470 therapy but histological differentiation from Leydig-cell tumors is quite difficult [66].  
471 Ulbright *et al.*, [3] reported unusual features of LCTs e.g. adipose differentiation, calcification  
472 with ossification, and spindle-shaped tumor cells in both young and ageing patients.  
473 Awareness of these features may prevent misinterpretation.

474 Two standards are currently used to distinguish between hyperplastic nodules from  
475 adenomas. An adenoma classification is warranted if its diameter exceeds either one  
476 seminiferous tubule cross-section [67] or three seminiferous tubule cross-sections [69].  
477 Leydig cell hyperplasia (focal or diffuse) and adenomas are commonly observed in laboratory  
478 rodents. The spontaneous incidence of adenomas in ageing Sprague-Dawley and inbred  
479 Fischer 344 rats, as well as mature CD-1 and B6C3F1 mice, have been documented [68].  
480 Morphologically, no differences appear between spontaneous or chemically induced Leydig  
481 cell adenomas [69].

482 Increased PPAR expression in organ pathophysiology e.g. liver, heart, intestine, and renal  
483 proximal tubules, is currently only partially elucidated [70-73]. We showed, for the first time,  
484 a PPAR expression pattern in normal human Leydig cells and its prominent down regulation  
485 in LCT. Immunoreactive PPAR $\alpha$  and  $\beta$  were clearly apparent in testicular germ cell tumors  
486 [74]. A similar correlation was found in dog testis, and PPAR expression was always  
487 markedly higher in tumor tissue [75]. Recently, Kadivir *et al.*, [76] reported a relationship  
488 between PPAR mRNA expression and spermatozoa motility in rams. Notably, confusing  
489 results were seen concerning the involvement of PPAR in tumor biology. PPAR was revealed

490 to both promote and inhibit cancer *via* effects on cell differentiation, growth, metastasis, and  
491 lipid metabolism [77].

492 In our findings, both *in vivo* and *in vitro* studies revealed a partnership between GPER,  
493 PPAR, and lipid homeostasis-controlling molecules in LCT. These molecules showed altered  
494 expression patterns in relation to GPER and PPAR expression in LCT.

495 The effect of either GPER or PPAR on cholesterol content suggests alterations in  
496 cholesterol synthesis and/or storage that may be based on GPER and/or PPAR disturbances.  
497 Recent studies have also linked lipids abundance with increased tumor aggressiveness and its  
498 resistance to chemotherapy [78]. Wang *et al.*, [79] reported high cholesterol content and  
499 infertility in HSL knockout mice; however, no information on Leydig cell function was  
500 provided. Our studies revealed HSL expression was not disturbed in LCTs. Findings by  
501 Christian *et al.*, [80] showed that autophagy influences lipid metabolism *via* both lipogenesis  
502 (supporting cell growth within nutrient-limited areas, thereby contributing to tumor symbiotic  
503 relationships) and lipolysis. Lipid droplets may induce autophagy and undergo lipophagy to  
504 avoid lipotoxicity, a phenomenon caused by excessive lipid accumulation with involvement  
505 of the mTOR signaling pathway [81]. Thus, we show increased cholesterol content without  
506 activated mTOR can indirectly result in lipophagy induction in LCTs. It seems this particular  
507 tumor can have a distinct biology, but it is possible that some mechanisms can be induced  
508 later when its development is more advanced.

509 Lastly, findings by Ma *et al.*, [82] demonstrated that culture of rat Leydig cells in hypoxic  
510 conditions decreased cholesterol content. These findings indicate that, besides well-known  
511 lipid homeostasis controlling molecules, a number of factors of various origin/nature are  
512 implicated in its regulation. In steroidogenic cells, the mechanism underlying lipid turnover  
513 and receptor involvement remained unanswered [77] however, based on these results, GPER-  
514 PPAR cross-talk should be taken into consideration. The question also arises whether some of

515 these factors and/or molecules, when disturbed, lead to Leydig cell tumorigenesis with  
516 additional perturbations in lipid homeostasis/steroidogenesis, or whether perturbations in lipid  
517 homeostasis-controlling factors/molecules occur as a result of tumor initiation and  
518 development. Based on all of the aforementioned results, both mechanisms are equally  
519 possible.

520 The color of LCTs usually ranges from brown to yellow to gray-white depending on the  
521 lipid content of the tumor [83]. The golden-brown appearance (usually imparted by the  
522 abundant lipofuscin pigment of tumor cells) is very characteristic. According to our results, in  
523 LCTs, lipid homeostasis is disturbed as seen for other endocrine and non-endocrine tumors  
524 [84]. Various changes were revealed in expression and localization of lipid balance-  
525 controlling molecules, including those controlling steroidogenesis as well as  
526 phosphatidylinositol-3-kinase (PI3K)-Akt-mTOR signaling pathway. Scarce data concerning  
527 lipid homeostasis and/or its controlling molecules in rodent tumor Leydig cells are available.

528 The steroidogenic function of Leydig cells can be modulated in various physiological  
529 conditions. *In vivo* studies in young and ageing rats revealed increased sex steroid synthesis in  
530 animals administered with a TSPO ligand (FGIN-1-27) [85]. In both age groups, serum  
531 testosterone levels increased significantly. Herein, HSL and TSPO expression did not vary in  
532 LCTs, suggesting a subordinate role of these molecules in LCTs. In the Leydig cell line  
533 (M5480), an acute effect of hCG was observed as increased metabolism of cholesteryl esters  
534 was reported [87]. Moreover, in patients with testicular cancer, hCG treatment caused excess  
535 of estradiol secretion by the tumor [88]. In a mouse tumor Leydig cell line (mLTC-1),  
536 epidermal growth factor increased StAR activity and steroid production efficiency in a time-  
537 and dose-dependent manner with involvement of ERK, while LHR expression was  
538 significantly reduced [88]. In mice (C57BL/6J) with LCTs, cessation of steroidogenesis was  
539 present when LH and cAMP were removed [89]. We found prominent changes in LHR and

540 PKA expression, reflecting disturbances in lipid controlling mechanisms directly associated  
541 with central endocrine regulation and the local microenvironment. For example, due to  
542 implications of HMGCR in cancer cell proliferation and cooperation with Ras signaling,  
543 HMGCR is used as a molecular target of statins, cholesterol-lowering drugs [90].

544 Metabolic flux and availability of lipids is controlled directly by lipid droplets and  
545 peroxisomes. These lipids serve as membrane stabilizers and structural elements, protein  
546 modifiers and signaling molecules, as well as energy sources for cell growth, migration, and  
547 invasion [91,92]. Therefore, failure of one of the lipid machinery components results in a  
548 negative effect on global cell physiology and lipid homeostasis. In pancreatic cancer, the  
549 content of lipid droplets is mobilized under a restricted cholesterol-rich, low-density  
550 lipoprotein (LDL) supply. Limiting LDL uptake reduces the oncogenic properties of this  
551 cancer and renders it more sensitive to cytotoxic drugs [93].

552 It is worth noting that lipid droplet associated proteins are actively involved in modulating  
553 lipid homeostasis by generating sites for steroidogenic enzyme activity [94, 95]. Marked  
554 expression changes in PLIN reflect that it can affect steroidogenic enzymes, thereby aiding in  
555 the development of LCTs. Upon stimulation of mLTC-1 cells with LH or 8-bromo-cAMP,  
556 large lipid droplets become much smaller and are dispersed throughout the cytosol.  
557 Lukyaenko *et al.*, [95] demonstrated lipophilic macrophage-derived factor as a highly active,  
558 acute regulator of steroidogenesis, acting through a high capacity StAR-independent pathway.

559 Alterations in the mitochondrial status affect cell lipid homeostasis and steroid biosynthesis  
560 efficiency [96, 97]. Mitophagy serves as an indispensable mechanism to transfer damaged  
561 mitochondria for lysosomal degradation. In LCTs, either mitochondrial function and/or  
562 mitophagy can be altered, thus affecting lipid homeostasis as indirectly shown through  
563 perturbations in StAR expression patterns.

564 It is worth adding that lipids have been recognized as a component of metabolic  
565 reprogramming in tumor cells [98]. Many tumors show a reactivation of *de novo* fatty-acid  
566 synthesis for generation of membrane structural lipids; thus, they do not rely on lipids from  
567 the bloodstream [99]. Modulated lipid synthesis may also have a non-cell-autonomous role in  
568 cancer development. The growth and metastasis promotion of LCT cannot be excluded with  
569 participation of adipocytes [100]. In addition to their structural and signal transduction  
570 roles, lipids can also be broken down into bioactive lipid mediators, regulating a variety of  
571 carcinogenic processes including cell growth, cell migration, and metastasis formation, as  
572 well as the uptake of chemotherapeutic drugs [101, 102]. Therefore, based on our results  
573 that show alterations in various lipid-controlling molecules, further studies are needed to  
574 elucidate the type, role, and regulation of lipids synthesized in tumors of steroidogenic cells.  
575 In prostate cancer progression, stimulatory effect of insulin on steroidogenesis was reported  
576 [103].

577 Enhanced expression of sterol regulatory element binding proteins (SREBPs), involved in  
578 cholesterol and fatty acids synthesis through the Akt pathway (anchored-lipid membrane  
579 protein), correlates with tumor development, progression, and invasiveness, as well as  
580 increased lipid content in cell membranes [104]. Lipid raft disruption inhibits Akt  
581 activation thereby reducing tumor cell proliferation [105]. The tumor microenvironment has  
582 an essential role in the metabolic adaptation of cancer cells [77]. Through both the post-  
583 translational regulation and induction of transcriptional programs, the dysregulated PI3K-Akt-  
584 mTOR pathway coordinates the uptake and utilization of multiple nutrients e.g. lipids  
585 supporting the enhanced growth and proliferation of cancer cells [106]. In the testis, blockage  
586 of mTOR markedly decreased intracellular testosterone concentration [106]. In this study, we  
587 found PI3K, Akt, and mTOR signaling alterations present in LCTs. It is probable that, in  
588 LCTs, an increased phosphorylated and unphosphorylated kinases affect mTOR. The



589 activation of mTOR is possible by other signaling pathway or can be related to advanced LCT  
590 development [107]. Our earlier studies in mouse tumor Leydig cells revealed that GPER and  
591 PPAR inhibition activate PI3K and Akt [52] but mTOR is modulated diversely; inhibits by  
592 GPER antagonist alone and together with PPAR $\gamma$  antagonist as well as activates by GPER  
593 with PPAR $\alpha$  together and the latter alone (supplementary Fig.7’).

594 Distinct changes in cGMP level suggests GPER-PPAR-mediated high or only *via* PPAR  
595 low metastatic activity of LCT. Besides antimetastatic strategy with cGMP against in  
596 colorectal cancer metastasis cGMP as a mediator of lipolysis in bovine oocytes was confirmed  
597 [108]. In LCTs, cGMP is important in maintaining lipid homeostasis when GPER and PPAR  
598 are absent.

599 The outcome of lipid content modification is a result of protein–protein cross-talk between  
600 messenger proteins, enzymes, and receptors that regulate pro-oncogenic and apoptotic  
601 interactions, including their activity that was revealed here also between GPER-PPAR and  
602 HMGCS and HMGCR resulting in overexpression of the latter enzymes that also is in line  
603 with our earlier study [52]. According to Ding *et al.*, [109], HMGCR is an important marker  
604 for tumor testis transformation in mice.

605 Understanding the principles underlying these processes and mechanisms, as well as their  
606 relationship, may provide an avenue for controlling cellular lipid balance (through  
607 manipulating lipid composition), including managing post-translational modifications of  
608 proteins as well as lipid-related gene expression in LCTs [110].

## 609 **Conclusion**

610 Mechanisms concerning Leydig cell tumorigenesis are scarce, and the role of lipid  
611 metabolism in tumor cells has long been disregarded. Recently, however, these mechanisms  
612 are recognized as the future of prominent target of therapy (Sreedhar and Zhao 2018).

613 Therefore, alterations in lipid- and cholesterol-associated proteins and mechanisms in LCTs  
614 are presented here for the first time.

615 Our findings shed light on the novel functional interplay between GPER and PPAR  
616 ultimately affecting lipid metabolism and steroidogenesis in LCTs. In addition, modifications  
617 of LHR, PKA, PLIN, HSL, StAR, TSPO, HMGCS, and HMGCR, together with cGMP and  
618 PI3K-Akt-mTOR pathways, may be required in developing innovating approaches (combined  
619 with transcriptome/proteome analyses and lipidomic data) that target pathological processes  
620 of Leydig cells. There is an urgent need for additional experimental and clinical data to  
621 complete the current knowledge on the biology and molecular characteristics of LCTs.  
622 Ultimately, this will guide the early diagnostics, treatment, and surveillance of incoming  
623 patients with this disease.

624

#### 625 **Author contributions**

626 Authors' contribution to the work described in the paper: M.K-B., E.G-W., M.K., P.D., A.M.,  
627 P.P., W.T., B.J. P., A.H. performed research. M.K-B., E.G-W., W.T., A.H., B.B., J.K. W.  
628 analyzed the data.

629 M.K.-B. designed the research study and wrote the paper. All authors have read and approved  
630 the final version of the manuscript.

631

#### 632 **Acknowledgments:**

633 The Authors are grateful to Grzegorz Kapuscinski, FEBU (urologist) and Robert Wyban, MS  
634 (LAB-IVF) (nOvum Fertility Clinic, Warszawa) for cooperation. We thank Dr. Grzegorz  
635 Wojtczak (Department of Cell Biology and Imaging, Institute of Zoology and Biomedical  
636 Research, Jagiellonian University in Kraków) for technical help in scanning electron

637 microscopic analyses and to Miss Maja Kudrycka and Miss Patrycja Dutka (Department of  
638 Endocrinology) for technical help in qRT-PCR and Western blotting analyses.

639

#### 640 **Financial disclosure statement**

641 This work was supported by a grant OPUS12 2016/23/B/NZ4/01788 (M.K-B) from National  
642 Science Centre, Poland.

643 **Conflict of Interest:** The authors declare that they have no conflict of interest.

644

645

#### 646 **References**

- 647 1. Cheville JC. Classification and pathology of testicular germ cell and sex cord-stromal  
648 tumors. *Urol Clin North Am.* 1999; 26:595–609.
- 649 2. Henderson CG, Ahmed AA, Sesterhenn I, Belman AB, Rushton HG. Enucleation for  
650 prepubertal leydig cell tumor. *J Urol.* 2006; 176: 703–705.
- 651 3. Emerson RE, Ulbright TM. Morphological approach to tumours of the testis and paratestis.  
652 *J Clin Pathol.* 2007; 60: 866–880.
- 653 4. Farkas LM, Székely JG, Pusztai C, Baki M. High frequency of metastatic Leydig cell  
654 testicular tumours. *Oncology.* 2000; 59: 118-121.
- 655 5. Gheorghisan-Galateanu AA. Leydig cell tumors of the testis: a case report. *BMC Res*  
656 *Notes.* 2014; 7: 656.
- 657 6. Bertram KA, Bratloff B, Hodges GF, Davidson H. Treatment of malignant Leydig cell  
658 tumor. *Cancer.* 1991; 68, 2324–2329.
- 659 7. Rich MA, Keating MA. Leydig cell tumors and tumors associated with congenital adrenal  
660 hyperplasia. *Urol Clin North Am.* 2000; 27: 519–528.
- 661 8. Gana BM, Windsor PM, Lang S, Macintyre J, Baxby K. Leydig cell tumor. *Br J Urol.*  
662 1995; 75: 676-678.
- 663
- 664 9. Lai N, Zeng X, Li M, Shu J. Leydig cell tumor with lung metastasis diagnosed by lung  
665 biopsy. *Int J Clin Exp Pathol.* 2015; 8: 12972–12976.
- 666
- 667 10. Laguna MP, Nicolai N, Oldenburg J; European Association of Urology. Guidelines on  
668 Testicular Cancer: 2015 Update. *Eur Urol.* 2015; 68:1054-1068.
- 669

- 670 11. Lejeune H, Habert R, Saez JM. Origin, proliferation and differentiation of Leydig cells. J  
671 Mol Endocrinol. 1998; 20: 1–25.  
672
- 673 12. Huang Y, Song J, Xu M, Zan Q. Primary Leydig cell tumour of epididymis: a rare case  
674 report with review of literature. *Andrologia*. 2013; 45: 430–433.  
675
- 676 13. Hekingil M, Altay B, Yakut BD, Soydan S, Ozyurt C, Killi R. Leydig cell tumor of the  
677 testis: comparison of histopathological and immunohistochemical features of three  
678 azoospermic cases and one malignant case. *Pathol Int*. 2001; 51: 792-796.  
679
- 680 14. Kim I, Young RH, Scully RE. Leydig cell tumors of the testis. A clinicopathological  
681 analysis of 40 cases and review of the literature. *Am J Surg Pathol*. 1985; 3: 177-192.  
682
- 683 15. Tiwari P, Goel A, Sharma P, Kumar S, Vijay M, Dutta A. Leydig cell tumor with  
684 mediastinal and lung metastasis. *Saudi J Kidney Dis Transpl*. 2011; 22: 354-356.  
685
- 686 16. Bozzini G, Ratti D, Carmignani L; en representación de Young Academic Urologists  
687 (YAU) Men's Health Group. Treatment of leydig cell tumours of the testis: Can testis-sparing  
688 surgery replace radicalorchidectomy? Results of a systematic review. *Actas Urol Esp*. 2017;  
689 41, 146-154.  
690
- 691 17. Giacaglia LR, Kohek MB da F, Carvalho FM, Fragoso MC, Mendonca B, Latronico AC.  
692 No evidence of somatic activating mutations on gonadotropin receptor genes in sex cord  
693 stromal tumors. *Fertil Steril*; 2000; 74: 992–995.  
694
- 695 18. Carvajal-Carmona LG, Alam NA, Pollard PJ, Jones AM, Barclay E, Wortham N, et al.,  
696 Adult leydig cell tumors of the testis caused by germline fumarate hydratase mutations. *J Clin  
697 Endocrinol Metab*. 2006; 91, 3071–3075.  
698
- 699 19. Skakkebaek NE, Rajpert-De Meyts E, Main KM. Testicular dysgenesis syndrome: an  
700 increasingly common developmental disorder with environmental aspects. *Hum Reprod*.  
701 2001; 5: 972-978.  
702
- 703 20. Joensen UN, Jørgensen N, Rajpert-De Meyts E, Skakkebaek NE. Testicular dysgenesis  
704 syndrome and Leydig cell function. *Basic Clin Pharmacol Toxicol*. 2008; 102: 155-161.  
705
- 706 21. Holm M, Rajpert-De Meyts E, Andersson AM, Skakkebaek NE. Leydig cell micronodules  
707 are a common finding in testicular biopsies from men with impaired spermatogenesis and are  
708 associated with decreased testosterone/LH ratio. *J Pathol*. 2003; 199: 378-386.  
709
- 710 22. Ho GT, Gardner H, Mostofi K, DeWolf WC, Loughlin KR, Morgentaler A. The effect of  
711 testicular nongerm cell tumors on local spermatogenesis. *Fertil Steril*. 1994; 62: 162-166.  
712
- 713 23. Lardone MC, Piottante A, Valdevenito R, Ebensperger M, Castro A. Histological and  
714 hormonal testicular function in oligo/azoospermic infertile men. *Andrologia*. 2013; 45, 379-  
715 385.
- 716 24. Kozina V, Geist D, Kubinová L, Bilić E, Karnthaler HP, Waitz T, et al., Visualization of  
717 Reinke's crystals in normal and cryptorchid testis. *Histochem Cell Biol*. 2011; 135: 215-228.  
718

- 719 25. Soerensen RR, Johannsen TH, Skakkebaek NE, Rajpert-De Meyts E. Leydig cell  
720 clustering and Reinke crystal distribution in relation to hormonal function in adult patients  
721 with testicular dysgenesis syndrome (TDS) including cryptorchidism. *Hormones (Athens)*.  
722 2016; 15: 518-526.  
723
- 724 26. Paniagua R, Nistal M, Bravo MP. Leydig cell types in primary testicular disorders. *Hum*  
725 *Pathol*. 1984; 15: 181-190.  
726
- 727 27. Zimmerli UU, Hedinger CE. Hyperplasia and hypertrophy of Leydig cells associated with  
728 testicular germ cell tumours containing syncytiotrophoblastic giant cells. *Virchows Arch A*  
729 *Pathol Anat Histopathol*. 1991; 419: 469-474.  
730
- 731 28. Dirami G, Teerds KJ, Cooke BA. Effect of a dopamine agonist on the development of  
732 Leydig cell hyperplasia in Sprague-Dawley rats. *Toxicol Appl Pharmacol*. 1996; 141, 169-  
733 177.  
734
- 735 39. Greaves P. Histopathology of preclinical toxicity studies : interpretation and relevance in  
736 drug safety evaluation. 4th ed. Amsterdam: Elsevier AP. 2012; p.1-867.  
737
- 738 30. Cook JC, Klinefelter GR, Hardisty JF, Sharpe RM, Foster PM. Rodent Leydig cell  
739 tumorigenesis: a review of the physiology, pathology, mechanisms, and relevance to humans.  
740 *Crit Rev Toxicol*. 1999; 2: 169-261.  
741
- 742 31. Gould ML, Hurst PR, Nicholson HD. The effects of oestrogen receptors alpha and beta  
743 on testicular cell number and steroidogenesis in mice. *Reproduction*. 2007; 134: 271-279.  
744
- 745 32. Kotula-Balak M, Hejmej A, Kopera I, Lydka M, Bilinska B. Prenatal and neonatal  
746 exposure to flutamide affects function of Leydig cells in adult boar. *Domest Anim*  
747 *Endocrinol*. 2012; 42: 142-154.  
748
- 749 33. Pawlicki P, Milon A, Zarzycka M, Galas J, Tworzydło W, Kaminska A, et al., Does  
750 signaling of estrogen-related receptors affect structure and function of bank vole Leydig cells?  
751 *J Physiol Pharmacol*. 2017; 68: 459-476.  
752
- 753 34. Tazi MF, Mellas S, El Fassi MJ, Farih MH. Leydig cell hyperplasia revealed by  
754 gynecomastia. *Rev Urol*. 2008; 10: 164-167.  
755
- 756 35. Carpino A, Rago V, Pezzi V, Carani C, Andò S. Detection of aromatase and estrogen  
757 receptors (ERalpha, ERbeta1, ERbeta2) in human Leydig cell tumor. *Eur J Endocrinol*. 2007;  
758 2: 239-244.  
759
- 760 36. Chimento A, Sirianni R, Casaburi I, Pezzi V. GPER Signaling in Spermatogenesis and  
761 Testicular Tumors. *Front Endocrinol (Lausanne)*. 2014; 6: 30.  
762
- 763 37. Kotula-Balak M, Milon A, Pawlicki P, Opydo-Chanek M, Galas J, Pacwa A, et al.,  
764 Diverse role of estrogen-related receptors  $\alpha$ ,  $\beta$  and  $\gamma$  in biology of tumor Leydig cell. *Tissue*  
765 *Cell*. 2018a; 52: 78-91.  
766

- 767 38. Fietz D, Ratzenböck C, Hartmann K, Raabe O, Kliesch S, Weidner W, Klug J, Bergmann  
768 M. Expression pattern of estrogen receptors  $\alpha$  and  $\beta$  and G-protein-coupled estrogen receptor  
769 1 in the human testis. *Histochem Cell Biol.* 2014; 142: 421-432.  
770
- 771 39. Fietz D, Bergmann M, Hartmann K. In Situ Hybridization of Estrogen Receptors  $\alpha$  and  $\beta$   
772 and GPER in the Human Testis. *Methods Mol Biol.* 2016; 1366: 189-205.  
773
- 774 40. Levin ER. Minireview: extranuclear steroid receptors: roles in modulation of cell  
775 functions. *Mol Endocrinol.* 2011; 25: 377-384.  
776
- 777 41. Schmidt A, Endo N, Rutledge SJ, Vogel R, Shinar D, Rodan GA. Identification of a new  
778 member of the steroid hormone receptor superfamily that is activated by a peroxisome  
779 proliferator and fatty acids. *Mol Endocrinol.* 1992; 6: 1634-1641.  
780
- 781 42. Braissant O, Fougelle F, Scotto C, Dauça M, Wahli W. Differential expression of  
782 peroxisome proliferator-activated receptors (PPARs): tissue distribution of PPAR-alpha, -  
783 beta, and -gamma in the adult rat. *Endocrinology.* 1996; 137: 354-366.  
784
- 785 43. Harada Y, Tanaka N, Ichikawa M, Kamijo Y, Sugiyama E, Gonzalez FJ, et al., PPAR $\alpha$ -  
786 dependent cholesterol/testosterone disruption in Leydig cells mediates 2,4-  
787 dichlorophenoxyacetic acid-induced testicular toxicity in mice. *Arch Toxicol.* 2016; 90: 3061-  
788 3071.  
789
- 790 44. Biegel LB, Hurtt ME, Frame SR, O'Connor JC, Cook JC. Mechanisms of extrahepatic  
791 tumor induction by peroxisome proliferators in male CD rats. *Toxicol Sci.* 2001; 1: 44-55.  
792
- 793 45. Hess RA. Estrogen in the adult male reproductive tract: A review. *Reprod Biol*  
794 *Endocrinol.* 2003; 1: 52.  
795
- 796 46. Maris P, Campana A, Barone I, Giordano C, Morelli C, Malivindi R, et al., Androgens  
797 inhibit aromatase expression through DAX-1: insights into the molecular link between  
798 hormone balance and Leydig cancer development. *Endocrinology.* 2015; 4: 1251-1262.  
799
- 800 47. Seyfried TN, Shelton LM. Cancer as a metabolic disease. *Nutr Metab.* 2010; 27: 7.  
801
- 802 48. Miller WL. A brief history of adrenal research: steroidogenesis - the soul of the adrenal.  
803 *Mol Cell Endocrinol.* 2013; 22: 5-14.  
804
- 805 49. Liu TF, Tang JJ, Li PS, Shen Y, Li JG, Miao HH, Li BL, Song BL. Ablation of gp78 in  
806 liver improves hyperlipidemia and insulin resistance by inhibiting SREBP to decrease lipid  
807 biosynthesis. *Cell Metab.* 2012; 8: 213-225.  
808
- 809 50. Ascoli M. Characterization of several clonal lines of cultured Leydig tumor cells:  
810 gonadotropin receptors and steroidogenic responses. *Endocrinology.* 1981; 108: 88-95.  
811
- 812 52. Gorowska-Wojtowicz E, Dutka P, Kudrycka M, Pawlicki P, Milon A, Plachno B.J, et al.,  
813 Regulation of steroidogenic function of mouse Leydig cells: G-coupled membrane estrogen  
814 receptor and peroxisome proliferator-activated receptor partnership. *J Physiol Pharmacol.*  
815 2018; 69: xx-xx.  
816

- 817 53. Kotula-Balak M, Chojnacka K, Hejmej A, Galas J, Satola M, Bilinska B. Does 4-tert-  
818 octylphenol affect estrogen signaling pathways in bank vole Leydig cells and tumor mouse  
819 Leydig cells in vitro? *Reprod Toxicol.* 2013; 39: 6-16.  
820
- 821 54. Kotula-Balak M, Pawlicki P, Milon A, Tworzydło W, Sekula M, Pacwa A, et al., The role  
822 of G-protein-coupled membrane estrogen receptor in mouse Leydig cell function-in vivo and  
823 in vitro evaluation. *Cell Tissue Res* 2018b, doi: 10.1007/s00441-018-2861-7.  
824
- 825 55. Smolen AJ. Image analytic techniques for quantification of immunocytochemical staining  
826 in the nervous system. Conn PM. (Ed.), *Methods Neurosci Acad Press*, San Diego 1999; pp.  
827 208–229.  
828
- 829 56. Al-Agha OM, Axiotis CA. An in-depth look at Leydig cell tumor of the testis. *Arch*  
830 *Pathol Lab Med.* 2007; 131: 311–317.  
831
- 832 57. Richmond I, Banerjee SS, Eyden BP, Sissons MC. Sarcomatoid Leydig cell tumor of the  
833 testis. *Histopathology.* 1995; 27: 578–580.  
834
- 835 58. Ghadially FN. *Ultrastructural Pathology of the Cell and Matrix.* 4th ed. Boston, Mass:  
836 Butterworth-Heinemann; 1997.  
837
- 838 59. Carreau S, Wolczynski S, Galeraud-Denis I. Aromatase, oestrogens and human male  
839 reproduction. *Philos Trans R Soc Lond B Biol Sci.* 2010; 365: 1571–1579.  
840
- 841 60. Sirianni R, Chimento A, Malivindi R, Mazzitelli I, Andò S, Pezzi V. Insulin-like growth  
842 factor-I, regulating aromatase expression through steroidogenic factor 1, supports estrogen-  
843 dependent tumor Leydig cell proliferation. *Cancer Res.* 2007; 67: 8368 – 8377.  
844
- 845 61. Fowler KA, Gill K, Kirma N, Dillehay DL, Tekmal RR. Overexpression of aromatase  
846 leads to development of testicular leydig cell tumors: an in vivo model for hormone-mediated  
847 testicular cancer. *Am J Pathol.* 2000; 156: 347–353.  
848
- 849 62. Chimento A, Casaburi I, Bartucci M, Patrizii M, Dattilo R, Avena P, et al., Selective  
850 GPER activation decreases proliferation and activates apoptosis in tumor Leydig cells. *Cell*  
851 *Death Dis.* 2011; 1: 4:e747.  
852
- 853 63. Rago V, Romeo F, Giordano F, Ferraro A, Ando S, Carpino A. Identification of ERbeta1  
854 and ERbeta2 in human seminoma, in embryonal carcinoma and in their adjacent intratubular  
855 germ cell neoplasia. *Reprod Biol Endocrinol.* 2009; 7:56.10.1186/1477-7827-7-56.  
856
- 857 64. Rago V, Romeo F, Giordano F, Maggiolini M, Carpino A. Identification of the estrogen  
858 receptor GPER in neoplastic and non-neoplastic human testes. *Reprod Biol Endocrinol.*  
859 2011; 9:135.10.1186/1477-7827-9-135.  
860
- 861 65. Salerno M, Cascio O, Bertozzi G, Sessa F, Messina A, Monda V, et al., Anabolic  
862 androgenic steroids and carcinogenicity focusing on Leydig cell: a literature review.  
863 *Oncotarget.* 2018; 10: 19415-19426.  
864

- 865 66. Altieri VM, Altieri B, Castellucci R, Alba S, Bottone F, Fragalà E, et al., Leydig cell  
866 tumour and giant adrenal myelolipoma associated with adrenogenital syndrome: a case report  
867 with a review of the literature. *Urologia*. 2016; 83: 43-48.  
868
- 869 67. BOOmIan GA, Eustis SL, Elwell MR, Montgomery CA, MacKenzie WF, (eds.)  
870 Pathology of the Fischer rat: Reference and atlas. San Diego: Academic Press; 1990.  
871
- 872 68. McConnell RF, Westen HH, Ulland BM, Bosland MC, Ward JM. Proliferative lesions of  
873 the testes in rats with selected examples from mice. URG-3, Guides for toxicologic pathology,  
874 STP/ARP/AFIP, Washington; 1992.  
875
- 876 69. Clegg ED, Cook JC, Chapin RE, Foster PM, Daston GP. Leydig cell hyperplasia and  
877 adenoma formation: mechanisms and relevance to humans. *Reprod Toxicol*. 1997; 11: 107-  
878 121.  
879
- 880 70. Rasoulpour RJ, Terry C, LeBaron MJ, Stebbins K, Ellis-Hutchings RG, Billington R.  
881 Mode-of-action and human relevance framework analysis for rat Leydig cell tumors  
882 associated with sulfoxaflor. *Crit Rev Toxicol*. 2014; 2: 25-44.  
883
- 884 71. Aoyama T, Peters JM, Iritani N, Nakajima T, Furihata K, Hashimoto T, et al., Altered  
885 constitutive expression of fatty acid-metabolizing enzymes in mice lacking the  
886 peroxisomeproliferator-activated receptor alpha (PPARalpha). *J Biol Chem*. 1998; 273:  
887 5678-5684.  
888
- 889 72. Watanabe K, Fujii H, Takahashi T, Kodama M, Aizawa Y, Ohta Y, et al., Constitutive  
890 regulation of cardiac fatty acid metabolism through peroxisome proliferator-activated receptor  
891 alpha associated with age-dependent cardiac toxicity. *J Biol Chem*. 2000; 275: 22293-22299.  
892
- 893 73. Kamijo Y, Hora K, Tanaka N, Usuda N, Kiyosawa K, Nakajima T, et al., Identification of  
894 functions of peroxisome proliferator-activated receptor alpha in proximal tubules. *J Am Soc  
895 Nephrol*. 2002; 13: 1691- 1702.  
896
- 897 74. Hase T, Yoshimura R, Mitsuhashi M, Segawa Y, Kawahito Y, Wada S, et al., Expression  
898 of peroxisome proliferator-activated receptors in human testicular cancer and  
899 growthinhibition by its agonists. *Urology*. 2002; 60: 542-547.  
900
- 901 75. Sozmen M, Kabak YB, Gulbahar MY, Gacar A, Karayigit MO, Guvenc T, et al.,  
902 Immunohistochemical characterization of peroxisome proliferator-activated receptors in  
903 canine normal testis and testicular tumours. *J Comp Pathol*. 2013; 149: 10-18.  
904
- 905 76. Kadivar A, Heidari Khoei H, Hassanpour H, Ghanaei H, Golestanfar A, Mehraban H, et  
906 al., Peroxisome proliferator-activated receptors (PPAR $\alpha$ , PPAR $\gamma$  and PPAR $\beta/\delta$ ) gene  
907 expression profile on ram spermatozoa and their relation to the sperm motility. *Vet Res  
908 Forum*. 2016; 7: 27-34.  
909
- 910 77. Maan M, Peters JM2, Dutta M3, Patterson AD. Lipid metabolism and lipophagy in  
911 cancer. *Biochem Biophys Res Commun*. 2018; 10, pii: S0006-291X(18)30326-7.  
912
- 913 78. Tirinato L, Pagliari F, Limongi T, Marini M, Falqui A, Seco J, et al., An Overview of  
914 Lipid Droplets in Cancer and Cancer Stem Cells. *Stem Cells Int*. 2017:1656053.



- 915  
916 79. Wang F, Chen Z, Ren X, Tian Y, Wang, Liu C, et al., Hormone-  
917 sensitive lipase deficiency alters gene expression and cholesterol content of mousetestis.  
918 *Reproduction*. 2017; 2:175-185.  
919  
920 80. Christian P, Sacco J, Adeli K. Autophagy: Emerging roles in lipid homeostasis and  
921 metabolic control. *Biochim Biophys Acta*. 2013; 1831: 819–824.  
922  
923 81. Yang M, Zhang Y, Ren J. Autophagic Regulation of Lipid Homeostasis in  
924 Cardiometabolic Syndrome. *Front Cardiovasc Med*. 2018; 3: 38.  
925  
926 82. Ma Y, Zhou Y, Zhu YC, Wang SQ, Ping P, Chen XF. Lipophagy Contributes to  
927 Testosterone Biosynthesis in Male Rat Leydig Cells. *Endocrinology*. 2018; 2: 1119-1129.  
928  
929 83. Maizlin ZV, Belenky A, Kunichezky M, Sandbank J, Strauss S. Leydig cell tumors of the  
930 testis: gray scale and color Doppler sonographic appearance. *J Ultrasound Med*. 2004; 23:  
931 959-964.  
932  
933 84. Ishii T, Fukuzawa R, Sato T, Muroya K, Adachi M, Ihara K, et al., Gonadal macrophage  
934 infiltration in congenital lipoid adrenal hyperplasia. *Eur J Endocrinol*. 2016; 175: 127-132.  
935  
936 85. Chung JY, Chen H, Midzak A, Burnett AL, Papadopoulos V, Zirkin BR. Drug ligand-  
937 induced activation of translocator protein (TSPO) stimulates steroid production by aged  
938 brown Norway rat Leydig cells. *Endocrinology*. 2013; 154: 2156-2165.  
939  
940 86. Albert DH, Ascoli M, Puett D, Coniglio JG. Lipid composition and gonadotropin-  
941 mediated lipid metabolism of the M5480 murine Leydig celltumor. *J Lipid Res*. 1980; 21:  
942 862-867.  
943  
944 87. Morrish DW, Venner PM, Siy O, Barron G, Bhardwaj D, Outhet D. Mechanisms of  
945 endocrine dysfunction in patients with testicular cancer. *J Natl Cancer Inst*. 1990; 82: 412-  
946 418.  
947  
948 88. Manna PR, Jo Y, Stocco DM. Regulation of Leydig cell steroidogenesis by extracellular  
949 signal-regulated kinase 1/2: role of protein kinase A and protein kinase C signaling. *J*  
950 *Endocrinol*. 2007; 193: 53-63.  
951  
952 89. Moyle WR, Moudgal NR, Greep RO. Cessation of steroidogenesis in Leydig cell tumors  
953 after removal of luteinizing hormone and adenosine cyclic 3',5'-monophosphate. *J Biol Chem*.  
954 1971; 16: 4978-4982.  
955  
956 90. Basharat P, Arash H, Lahouti AH, Paik JJ, Albayda J, Pinal-Fernandez I, et al., Statin-  
957 induced Anti-HMGCR-associated Myopathy. *J Am Coll Cardiol*. 2016; 68: 234–235.  
958  
959 91. Baba Y, Funakoshi T, Mori M, Emoto K, Masugi Y, Ekmekcioglu S, et al., Expression of  
960 monoacylglycerol lipase as a marker of tumour invasion and progression in malignant  
961 melanoma. *J Eur Acad Dermatol Venereol*. 2017; 31: 2038-2045.  
962  
963 92. Hanahan D, Weinberg RA. Hallmarks of cancer: the next generation. *Cell*. 2011; 144:  
964 646–674.

- 965  
966 93. Yamaguchi T, Fujikawa N, Nimura S, Tokuoka Y, Tsuda S, Aiuchi T, et al.,  
967 Characterization of lipid droplets in steroidogenic MLTC-1 Leydig cells: Protein profiles and  
968 the morphological change induced by hormone stimulation. *Biochim Biophys Acta*. 2015;  
969 1851: 1285-1295.  
970  
971 94. Shen WJ, Azhar S, Kraemer FB. Lipid droplets and steroidogenic cells. *Exp Cell Res*.  
972 2016; 15: 209-214.  
973  
974 95. Lukyanenko YO, Carpenter AM, Brigham DE, Stocco DM, Hutson JC. Regulation of  
975 Leydig cells through a steroidogenic acute regulatory protein-independent pathway by a  
976 lipophilic factor from macrophages. *J Endocrinol*. 1998; 158: 267-275  
977  
978 96. Allen JA, Shankara T, Janus P, Buck S, Diemer T, Hales KH, et al., Energized, polarized,  
979 and actively respiring mitochondria are required for acute Leydig cellsteroidogenesis.  
980 *Endocrinology*. 2006; 147: 3924-3935.  
981  
982 97. Barbosa AD, Siniossoglou S. Function of lipid droplet-organelle interactions in lipid  
983 homeostasis. *Biochim Biophys Acta*. 2017; 1864: 1459-1468.  
984  
985 98. Schulze A, Harris AL. How cancer metabolism is tuned for proliferation and vulnerable  
986 to disruption. *Nature*. 2012; 491: 364-73.  
987  
988 99. Baenke F, Peck B, Miess H, Schulze A. Hooked on fat: the role of lipid synthesis in  
989 cancer metabolism and tumour development. *Dis Model Mech*. 2013; 6: 1353–1363.  
990  
991 100. Luo X, Cheng C, Tan Z, Li N, Tang M, Yang L, et al., Emerging roles of lipid  
992 metabolism in cancer metastasis. *Mol Cancer*. 2017; 16: 76.  
993  
994 101. Barrera G. Oxidative stress and lipid peroxidation products in cancer progression and  
995 therapy. *ISRN Oncol*. 2012; 137289.  
996  
997 102. Mostaghel EA, Nelson PS. Intracrine androgen metabolism in prostate cancer  
998 progression: mechanisms of castration resistance and therapeutic implications. *Best Pract Res*  
999 *Clin Endocrinol Metab*. 2008; 22: 243–258.  
1000  
1001 103. Bao J, Zhu L, Zhu Q, Su J, Liu M, Huang W. SREBP-1 is an independent prognostic  
1002 marker and promotes invasion and migration in breast cancer. *Oncol Lett*. 2016; 12: 2409–  
1003 2416.  
1004  
1005 104. Beloribi-Djefafli S, Vasseur S, Guillaumond F. Lipid metabolic reprogramming in  
1006 cancer cells. *Oncogenesis*. 2016; 25, e189.  
1007  
1008 105. Follo MY, Manzoli L, Poli A, McCubrey JA, Cocco L. PLC and PI3K/Akt/mTOR  
1009 signalling in disease and cancer. *Adv Biol Regul*. 2015; 57: 10-16.  
1010  
1011 106. Oliveira PF, Cheng CY, Alves MG. Emerging Role for Mammalian Target of  
1012 Rapamycin in Male Fertility. *Trends Endocrinol Metab*. 2017; 28: 165-167.  
1013

1014 107. Mendoza MC, Er EE, Blenis J. The Ras-ERK and PI3K-mTOR pathways: cross-talk and  
1015 compensation. Trends Biochem Sci. 2011; 36: 320-328.

1016

1017 108. Schwarz KRL, de Castro FC, Schefer L, Botigelli RC, Paschoal DM, Fernandes H, et al.,  
1018 The role of cGMP as a mediator of lipolysis in bovine oocytes and its effects on embryo  
1019 development and cryopreservation. PLoS One 2018; 13: e0191023.

1020

1021 109. Ding J, Jiang D, Kurczy M, Nalepka J, Dudley B, Merkel EI, et al., Inhibition of HMG  
1022 CoA reductase reveals an unexpected role for cholesterol during PGC migration in the mouse.  
1023 BMC Dev Biol. 2008; 31: 120.

1024

1025 110. Audagnotto M, Del Peraro M. Protein post-translational modifications: In silico  
1026 prediction tools and molecular modeling. Comput Struct Biotechnol J. 2017; 15: 307–319.

1027

## 1028 **Figure captures**

### 1029 **Figure 1. Morphology of human Leydig cell tumors – scanning electron microscopic** 1030 **analysis**

1031 (1a A-F and 1b G-L) Representative microphotographs of scanning electron microscopic  
1032 analysis of human Leydig cell tumors (LCTs). Bars represent 1µm. For analysis n = 12  
1033 specimens were used.

1034

### 1035 **Figure 2. Morphology of human Leydig cell tumors – hematoxylin-eosin staining**

1036 Representative microphotographs of (A) control human testis and (B, b-b''') Leydig cell  
1037 tumors (LCTs). Scale bars represent 15 µm. Staining was performed on serial testicular  
1038 sections from n = 12 specimens.

1039 LC- Leydig cells, EC - epithelial cells of blood vessels

1040 (b) - arrows depict cells of large polygonal shape with abundant, cytoplasm, indistinct cell  
1041 borders, and regular, round to oval nuclei. Prominent nucleus visible at (b) higher

1042 magnification (arrowheads), (b') - arrows depict cells with above features but possessing

1043 distinct cell borders and smaller nuclei, (b'') - arrows depict small cells with scant, densely

1044 eosinophilic cytoplasm and grooved nuclei, (b''') – arrows depict spindle-shaped

1045 (sarcomatoid) cells.

1046

1047 **Figure 3. Expression of GPER, PPAR $\alpha$ , PPAR $\beta$  and PPAR $\gamma$  in human Leydig cell**

1048 **tumor.**

1049

1050 (A) Representative blots of qualitative expression of GPER, PPAR $\alpha$ , and PPAR $\gamma$  and (B)  
1051 relative expression (relative quantification of protein density (ROD); arbitrary units). The  
1052 relative amount of respective proteins normalized to  $\beta$ -actin. ROD from three separate analyses  
1053 is expressed as means  $\pm$  SD. Asterisks show significant differences between respective control  
1054 and Leydig cell tumor (LCTs). Values are denoted as \*  $p < 0.05$ , \*\*  $p < 0.01$  and \*\*\* $p < 0.001$ .  
1055 Analysis was performed in triplicate (n = 7).

1056

1057 **Figure 3' Expression of GPER, PPAR $\alpha$ , PPAR $\beta$  and PPAR $\gamma$  mRNA in human Leydig**

1058 **cell tumor.**

1059

1060 Relative level (relative quantification; RQ) of mRNA for **GPER, PPAR $\alpha$ , PPAR $\beta$  and PPAR $\gamma$**   
1061 determined using real-time RT-PCR analysis 2 $^{-\Delta\text{Ct}}$  method. As an intrinsic control,  $\beta$ -actin  
1062 mRNA level was measured in the samples. RQ from three separate analyses is expressed as  
1063 means  $\pm$  SD. Asterisks show significant differences between respective control and Leydig cell  
1064 tumor (LCTs). Values are denoted as \*  $p < 0.05$ , and \*\*\* $p < 0.001$ . Analysis was performed in  
1065 triplicate (n = 7).

1066

1067

1068 **Figure 4. Localization of GPER, PPAR $\alpha$ , PPAR $\beta$  and PPAR $\gamma$  in human Leydig cell**

1069 **tumor.**

1070 Representative microphotographs of cellular localization of GPER (A, A'), PPAR $\alpha$  (B, B'),  
1071 PPAR $\beta$  (C, C') and PPAR $\gamma$  (D, D' and higher magnification at D) in control human testes (A-

1072 D and higher magnification at D) and Leydig cell tumor (LCTs). DAB immunostaining with  
1073 hematoxylin counterstaining. Scale bars represent 15  $\mu$ m. Staining was performed on serial  
1074 testicular sections from n = 12 specimens.

1075 Arrows depict cytoplasmic staining, arrowheads depict nuclear staining. No positive staining  
1076 is seen when the primary antibodies were omitted – insert at A and D'-(negative controls).

1077

1078 **Figure 5. Expression of LHR, PKA, PLIN, HSL, StAR, TSPO, HMGCS and HMGCR**  
1079 **in human Leydig cell tumor.**

1080 (A) Representative blots of qualitative expression of LHR, PKA, PLIN, HSL, PLIN, StAR,  
1081 TSPO, HMGCS and HMGCR and (B) relative expression (relative quantification of protein  
1082 density (ROD); arbitrary units). The relative amount of respective proteins normalized to  $\beta$ -  
1083 actin. ROD from three separate analyses is expressed as means  $\pm$  SD. Asterisks show significant  
1084 differences between respective control and Leydig cell tumor (LCTs). Values are denoted as \*  
1085  $p < 0.05$ , \*\*  $p < 0.01$  and \*\*\* $p < 0.001$ . Analysis was performed in triplicate (n = 7).

1086

1087 **Figure 5' Expression of LHR, PKA, PLIN, HSL, PLIN, StAR, TSPO, HMGCS and**  
1088 **HMGCR mRNA in human Leydig cell tumor.**

1089

1090 Relative level (relative quantification; RQ) of mRNA for LHR, PKA, PLIN, HSL, PLIN, StAR,  
1091 TSPO, HMGCS and HMGCR determined using real-time RT-PCR analysis  $2^{-\Delta\text{Ct}}$  method. As  
1092 an intrinsic control,  $\beta$ -actin mRNA level was measured in the samples. RQ from three separate  
1093 analyses is expressed as means  $\pm$  SD. Asterisks show significant differences between respective  
1094 control and Leydig cell tumor (LCTs). Values are denoted as \*  $p < 0.05$ , \*\*  $p < 0.01$  and  
1095 \*\*\* $p < 0.001$ . Analysis was performed in triplicate (n = 7).

1096

1097 **Figure 6. Localization of LHR, PKA, PLIN, HSL, StAR, TSPO, HMGCS and HMGCR**  
1098 **in human Leydig cell tumor.**

1099 Representative microphotographs of cellular localization of LHR (A-A'), PKA (B-B'), PLIN(  
1100 C-C' and higher magnifications at C and C'), HSL (D-D'), StAR (E-E'), TSPO (F-F'), HMGCS  
1101 (G-G') and HMGCR (H-H') in control human testes (A-H and higher magnification at C) and  
1102 Leydig cell tumor (A'-H' and higher magnification at C'). DAB immunostaining with  
1103 hematoxylin counterstaining. Scale bars represent 15  $\mu$ m. Staining was performed on serial  
1104 testicular sections from n = 12 specimens. Arrows depict cytoplasmic staining. Arrowheads  
1105 depict strong stained cells for TSPO and positively stained epithelial cells of blood vessels for  
1106 HSL. No positive staining is seen when the primary antibodies were omitted – insert at A and  
1107 F'-(negative controls).

1108  
1109

1110

1111 **Figure 7. Expression of PI3K-Akt-mTOR pathway in human Leydig cell tumor.**

1112 (A) Representative blots of qualitative expression of PI3K, Akt, mTOR and (B) relative  
1113 expression (relative quantification of protein density (ROD); arbitrary units). The relative  
1114 amount of respective proteins normalized to  $\beta$ -actin. ROD from three separate analyses is  
1115 expressed as means  $\pm$  SD. Asterisks show significant differences between control and Leydig  
1116 cell tumor (LCTs). Values are denoted as \*  $p < 0.05$ . Analysis was performed in triplicate (n  
1117 = 7).

1118

1119 **Figure 7' (supplementary). Effect of GPER and PPAR blockage on expression of mTOR**  
1120 **in MA-10 cells**

1121 (A) Representative blots of qualitative expression of mTOR and (B) relative expression  
1122 (relative quantification of protein density (ROD); arbitrary units). The relative amount of

1123 protein normalized to  $\beta$ -actin. ROD from three separate analyses is expressed as means  $\pm$  SD.  
1124 Asterisks show significant differences between control and treated Leydig cells. Values are  
1125 denoted as \*  $p < 0.05$ , \*\*  $p < 0.01$  and \*\*\* $p < 0.001$ . Analysis was performed in triplicate (n = 3  
1126 for each experimental group).

1127

1128 **Figure 8. Effect of GPER and PPAR blockage on expression on cholesterol content,**  
1129 **estradiol secretion and cGMP concentration in MA-10 cells**

1130 Cholesterol content (A), estradiol secretion (B) and cGMP concentration (C) in control and  
1131 treated with GPER (10nM), PPAR $\alpha$  (10 $\mu$ M) and PPAR $\gamma$  ( $\mu$ M) antagonists alone or in  
1132 combinations for 24h tumor mouse Leydig cells (MA-10). Asterisks show significant  
1133 differences between control and treated Leydig cells. Values are denoted as \*  $p < 0.05$ , \*\*  
1134  $p < 0.01$  and \*\*\* $p < 0.001$ . Analysis was performed in triplicate (n = 3 for each experimental  
1135 group).

1136

**1a**

bioRxiv preprint doi: <https://doi.org/10.1101/477901>; this version posted November 23, 2018. The copyright holder for this preprint (which was not certified by peer review) is the author/funder, who has granted bioRxiv a license to display the preprint in perpetuity. It is made available under aCC-BY 4.0 International license.

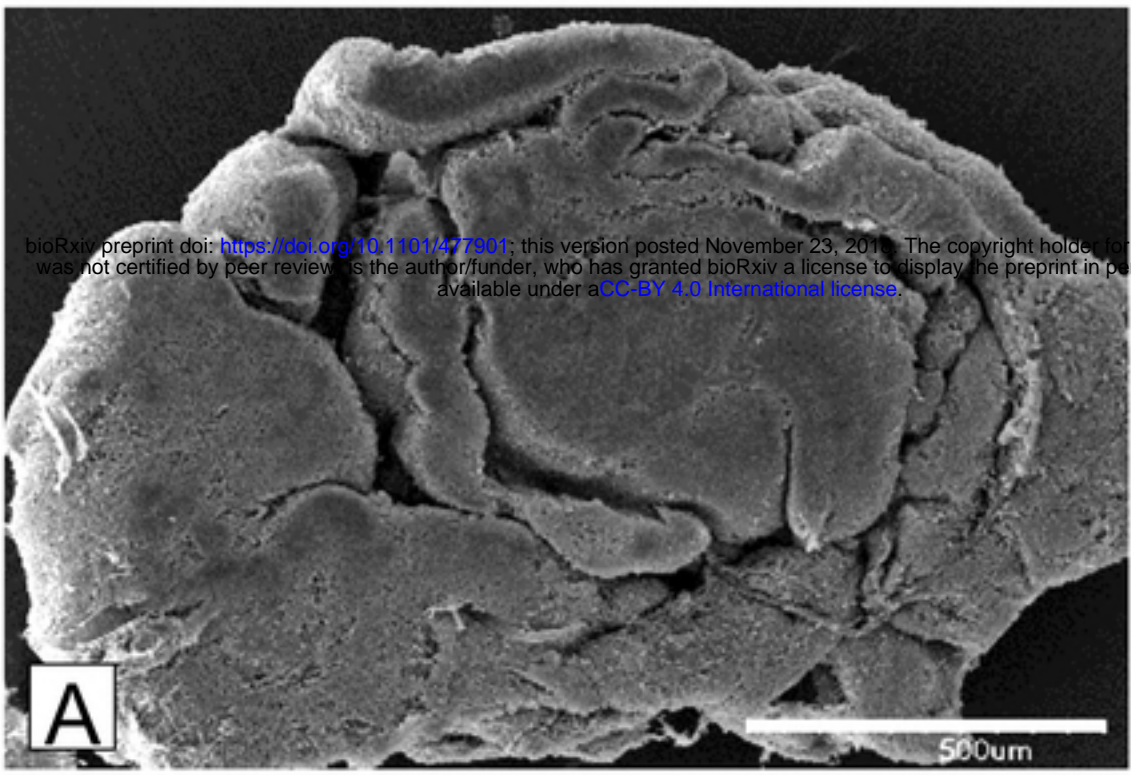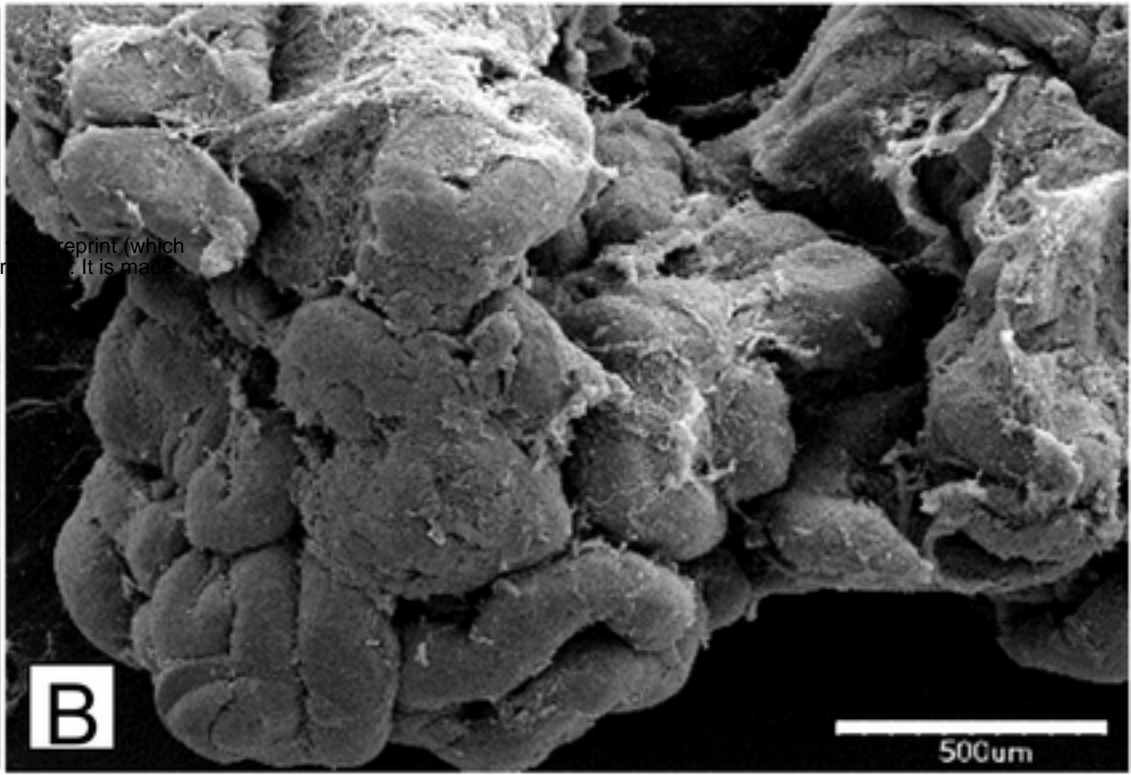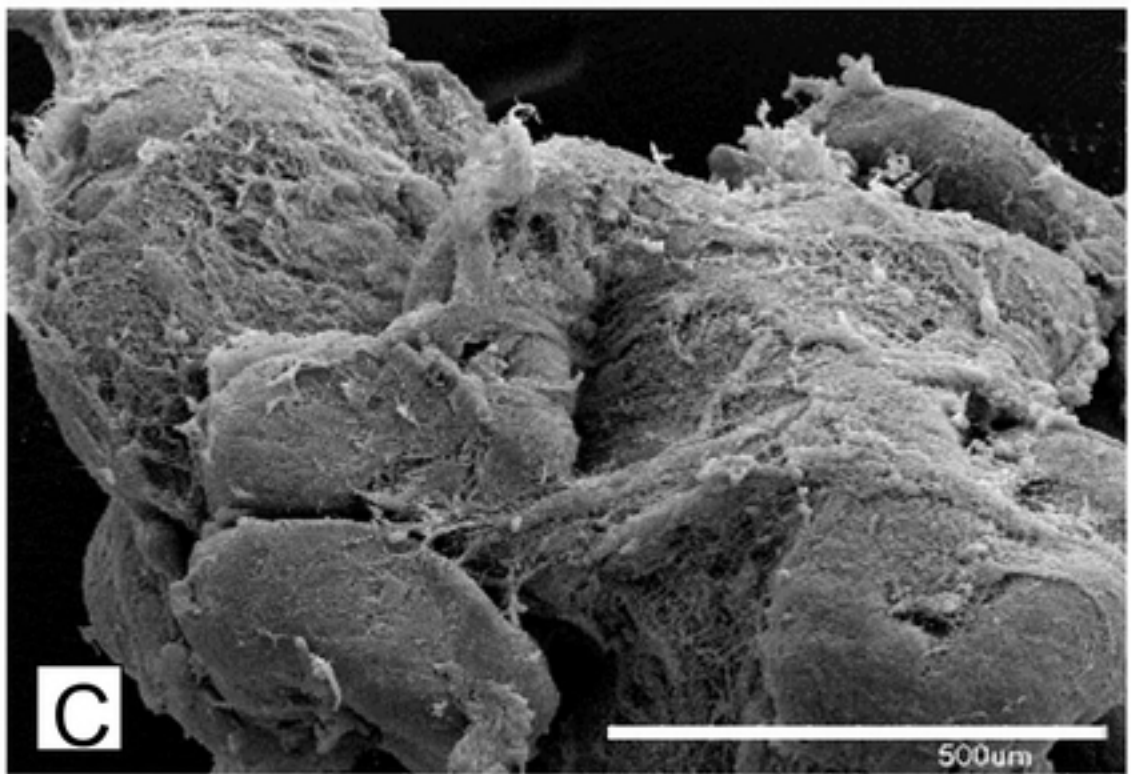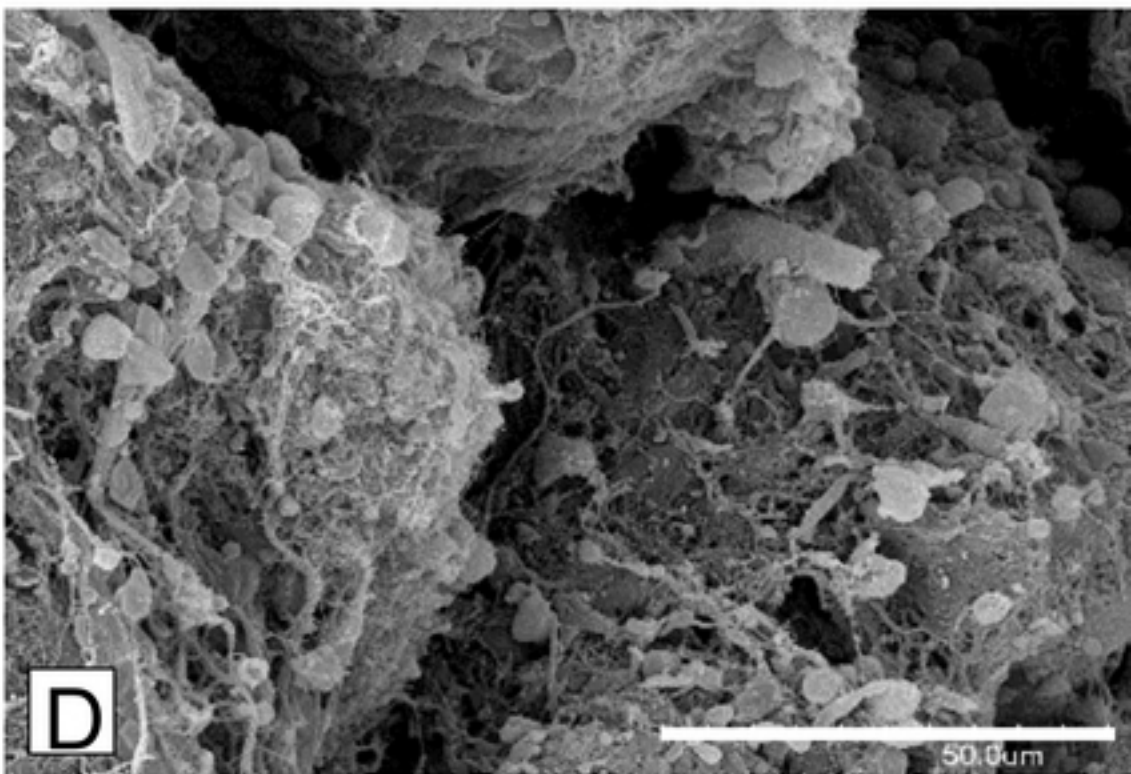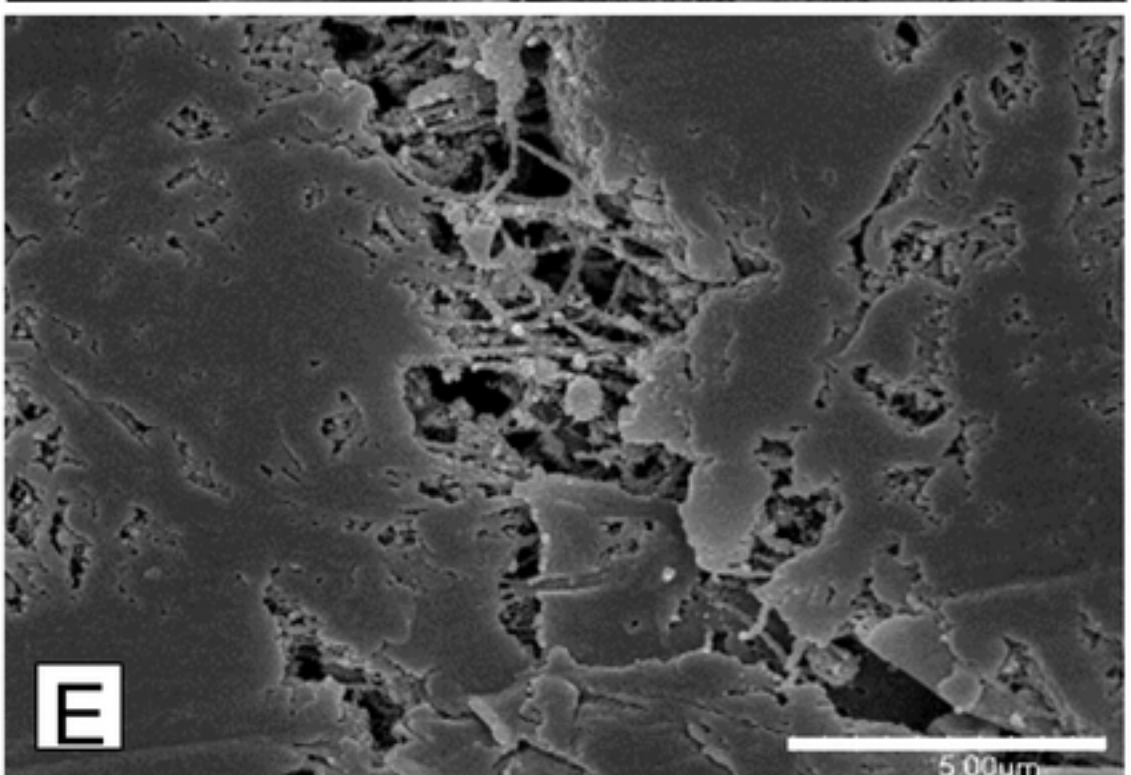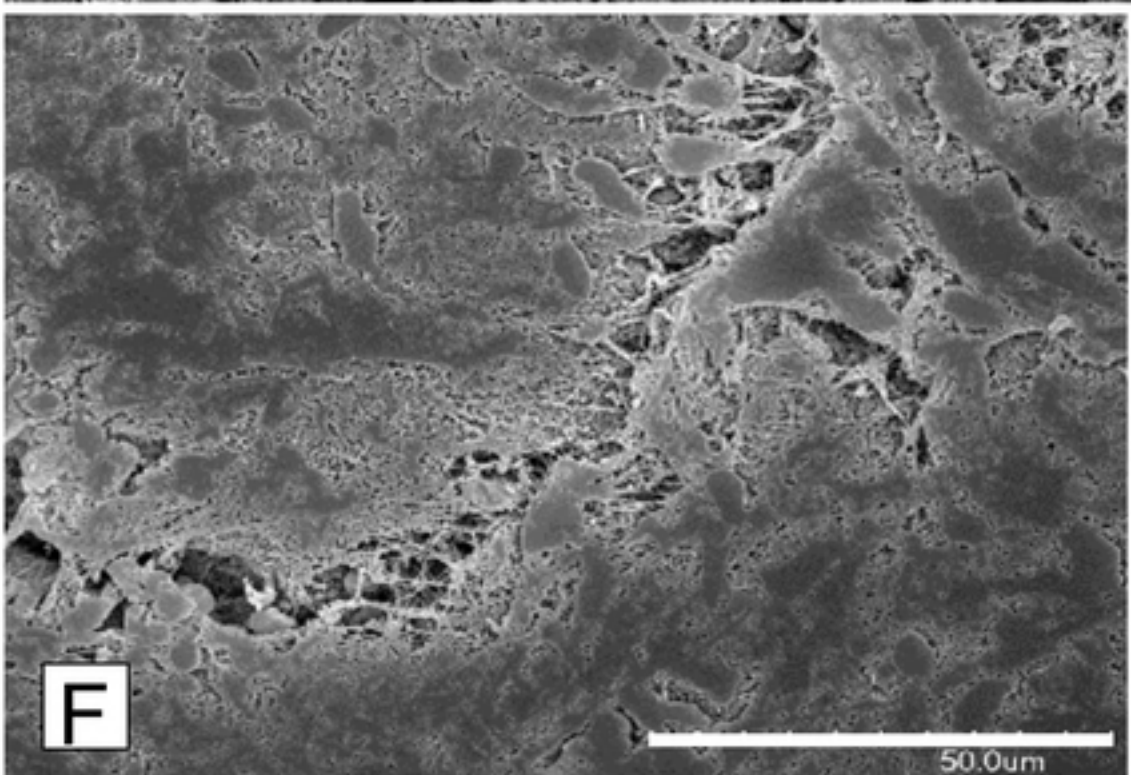

Figure 1a



**1b**

bioRxiv preprint doi: <https://doi.org/10.1101/477901>; this version posted November 23, 2018. The copyright holder for this preprint (which was not certified by peer review) is the author/funder, who has granted bioRxiv a license to display the preprint in perpetuity. It is made available under aCC-BY 4.0 International license.

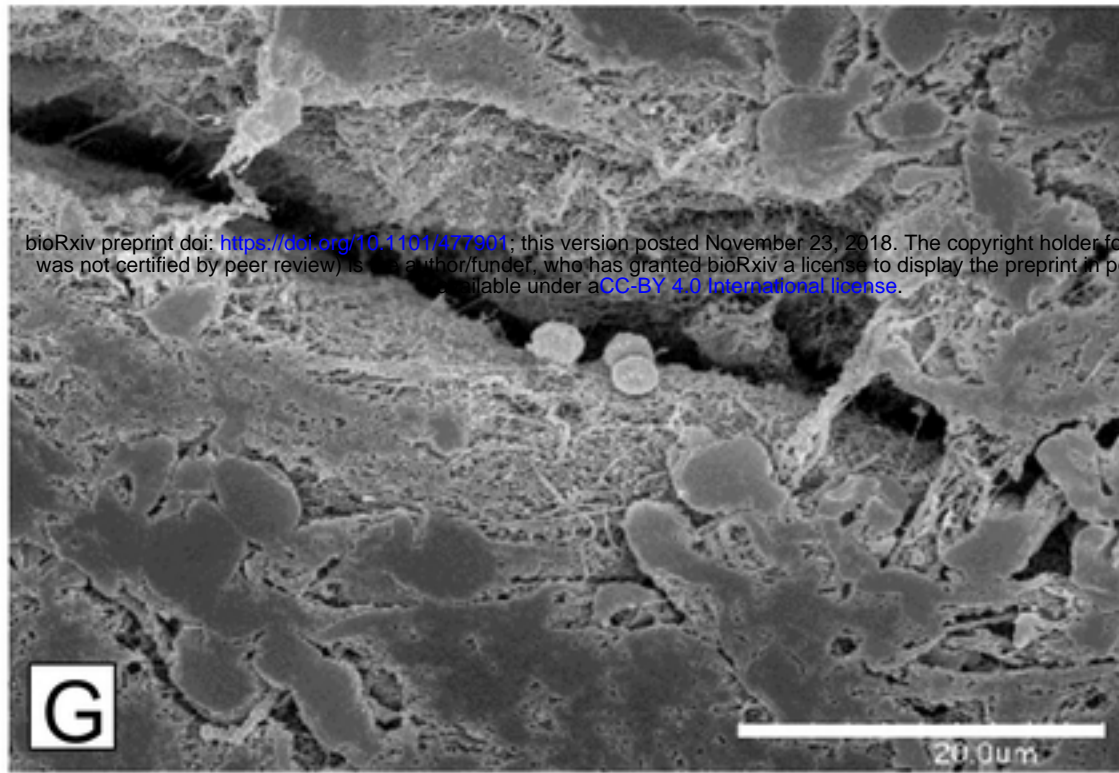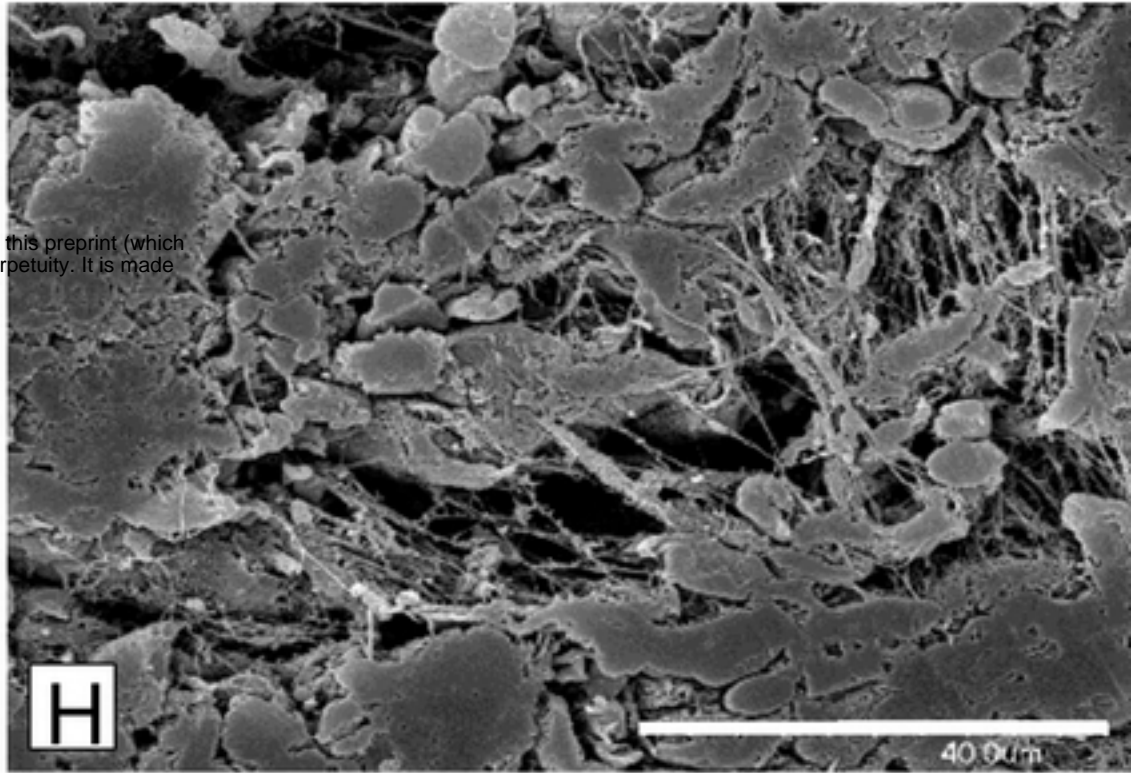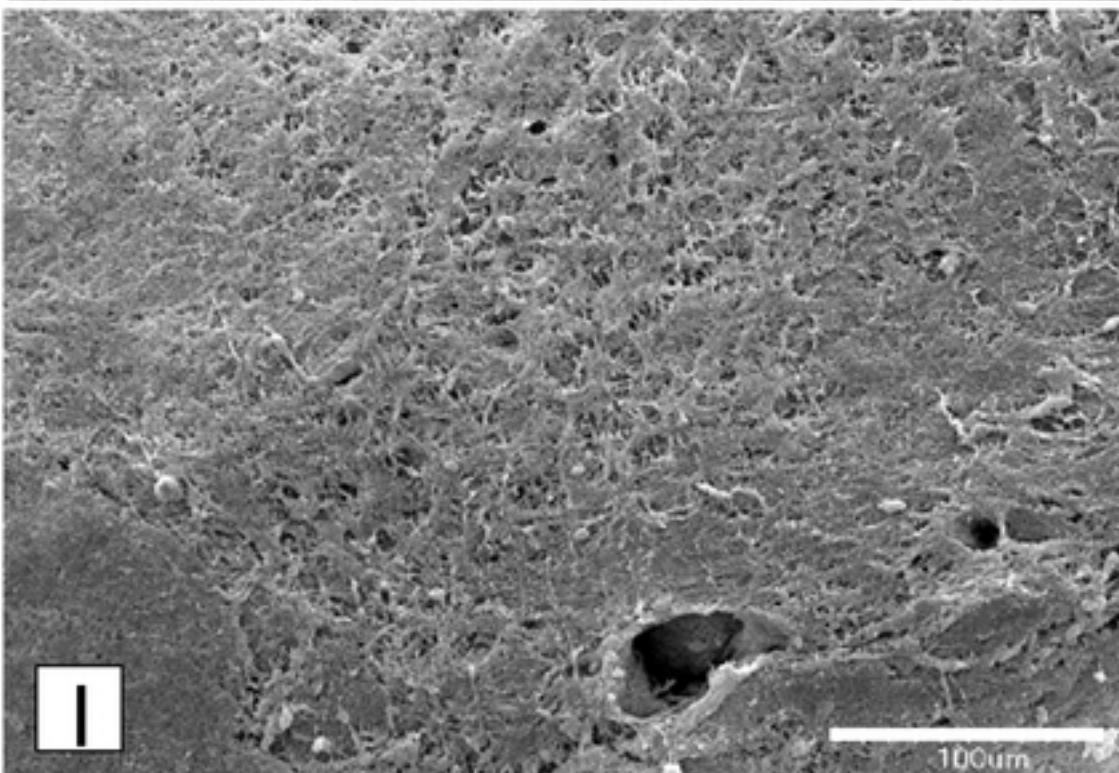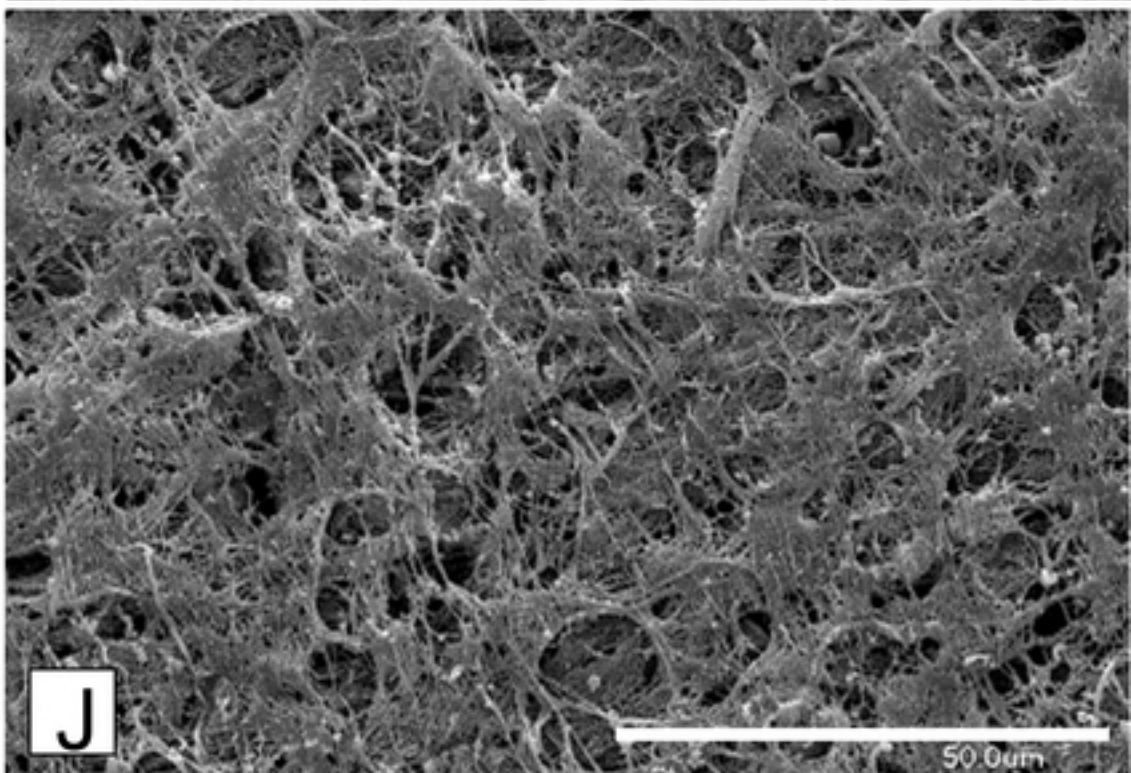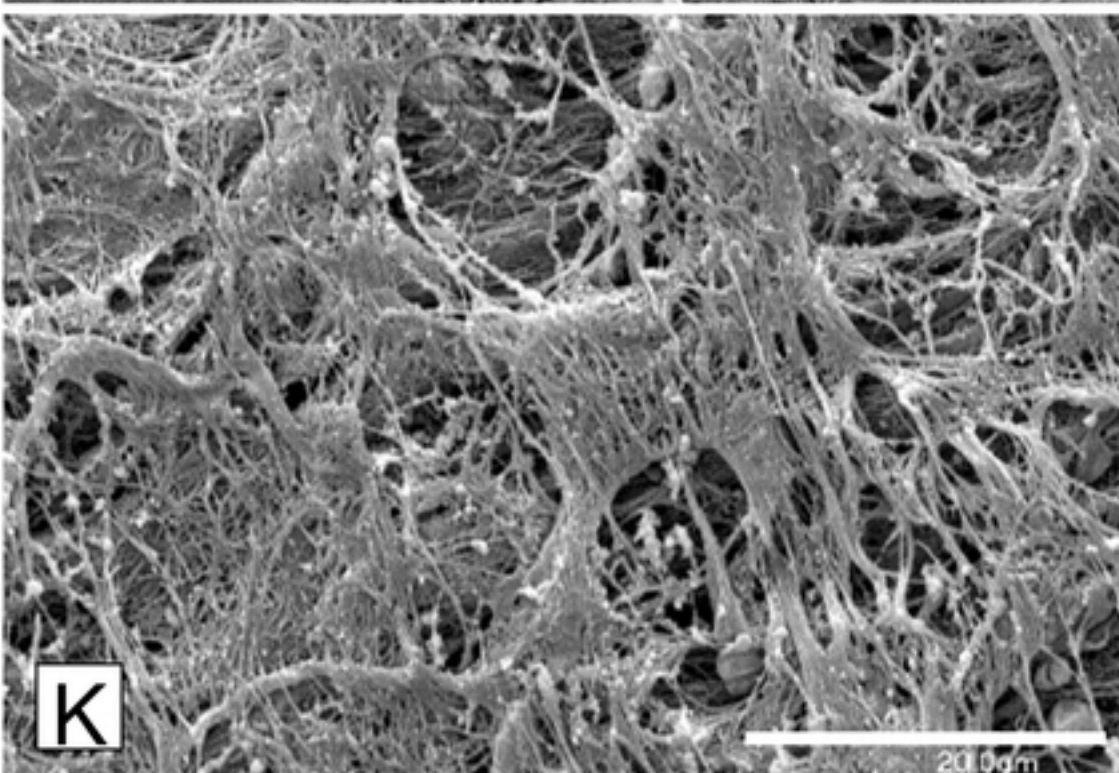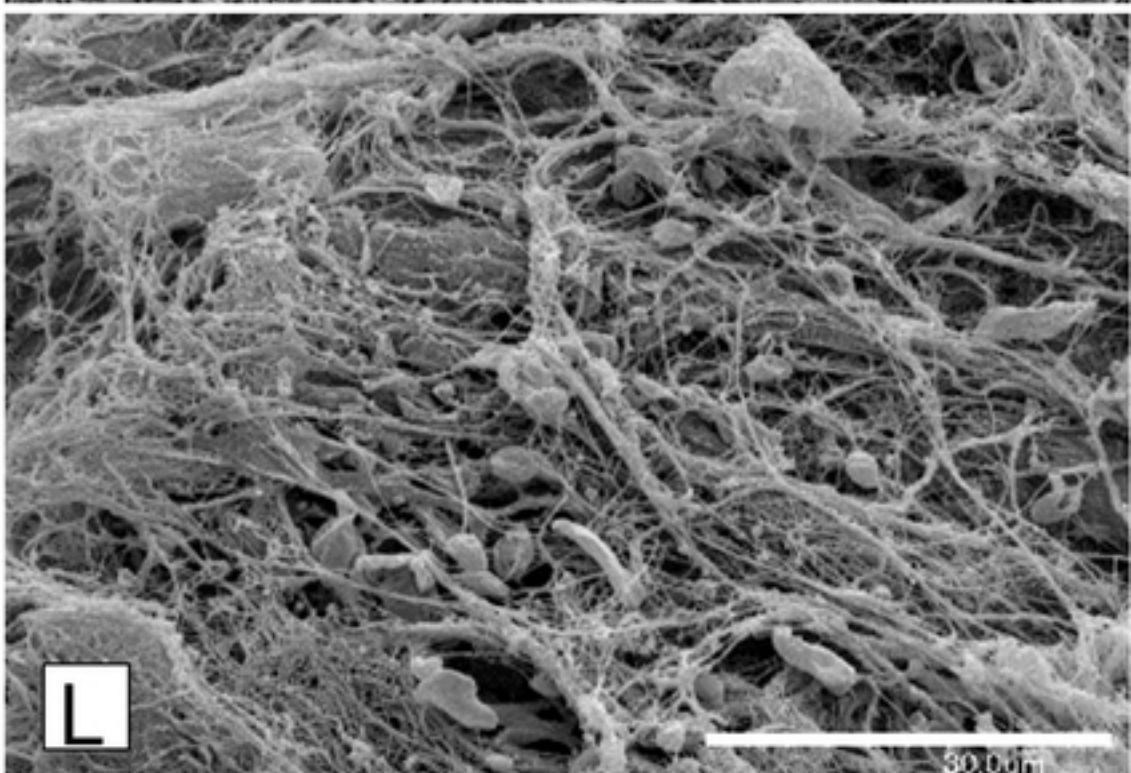

Figure 1b

2

Ctrl.

LCTs

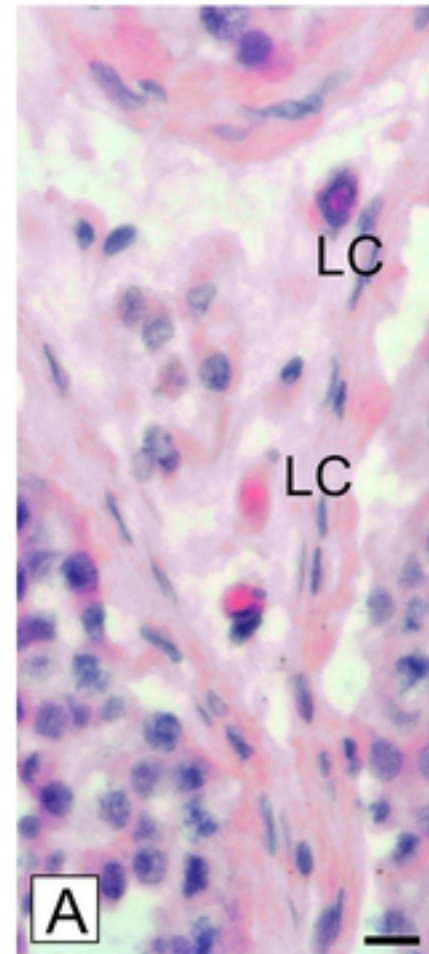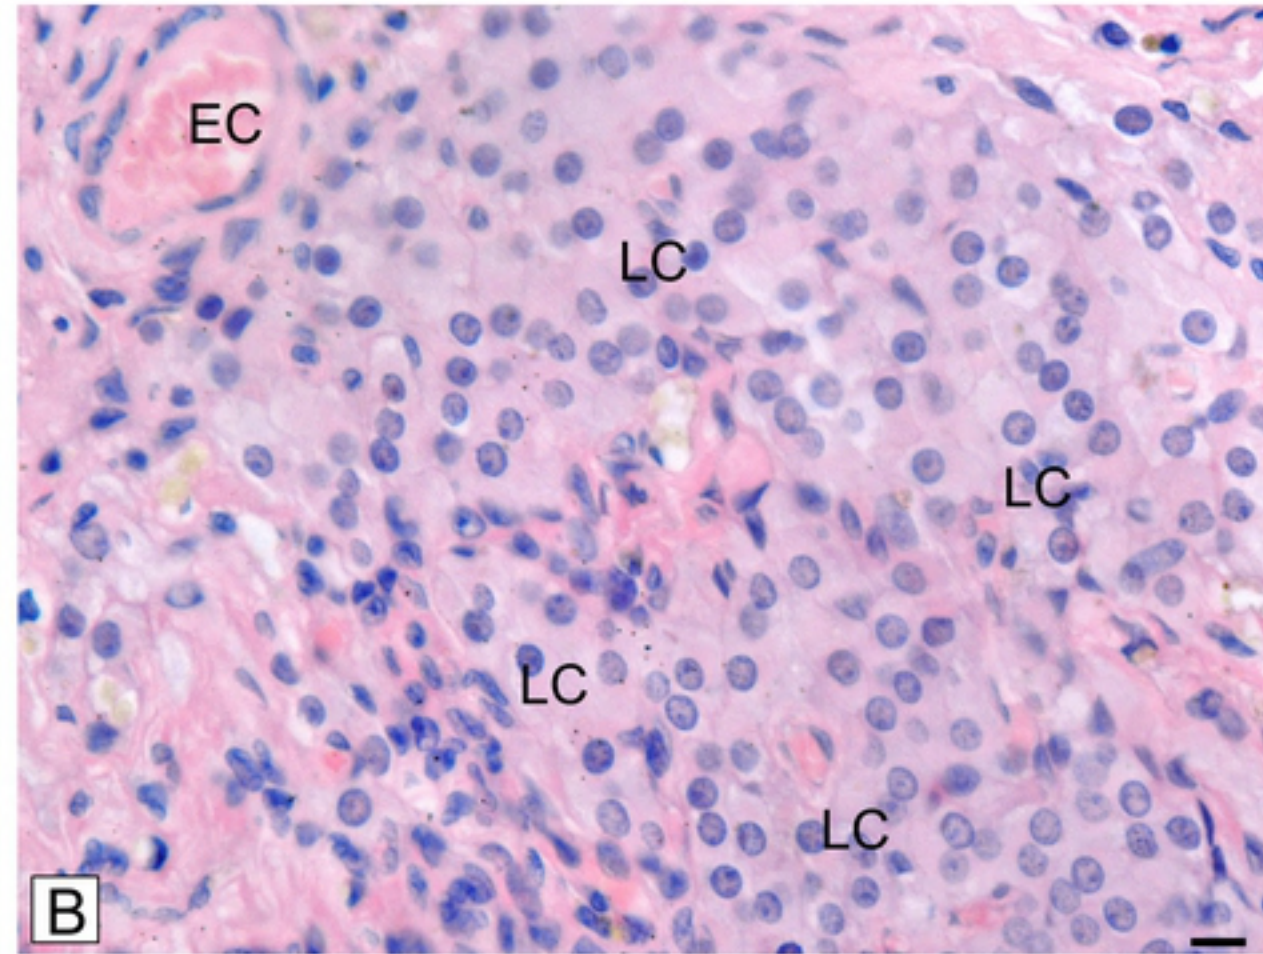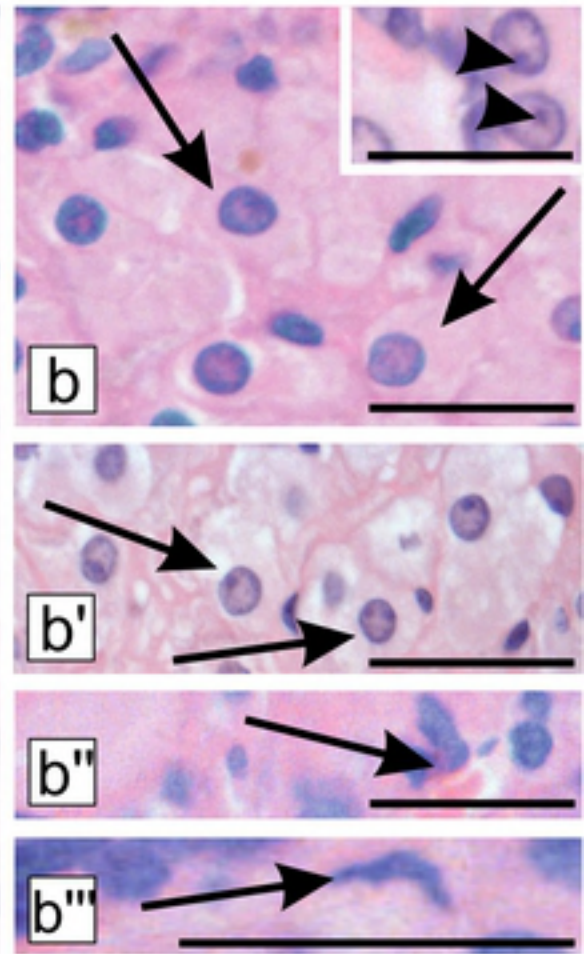

Figure 2

3.

A

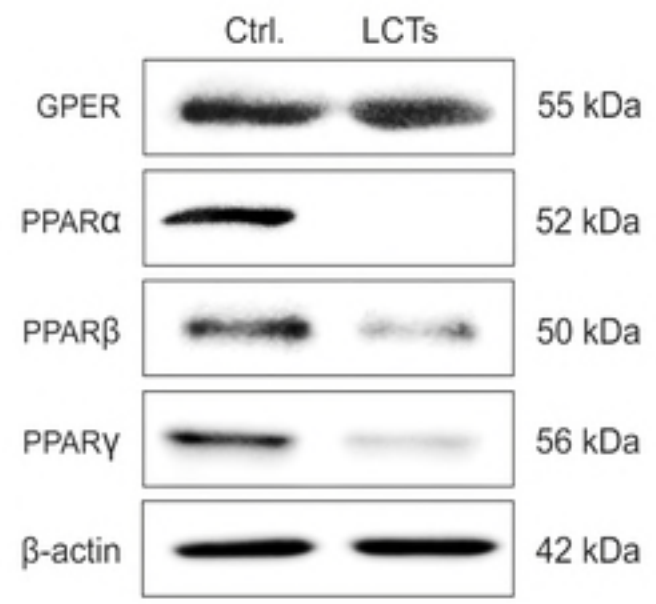

B

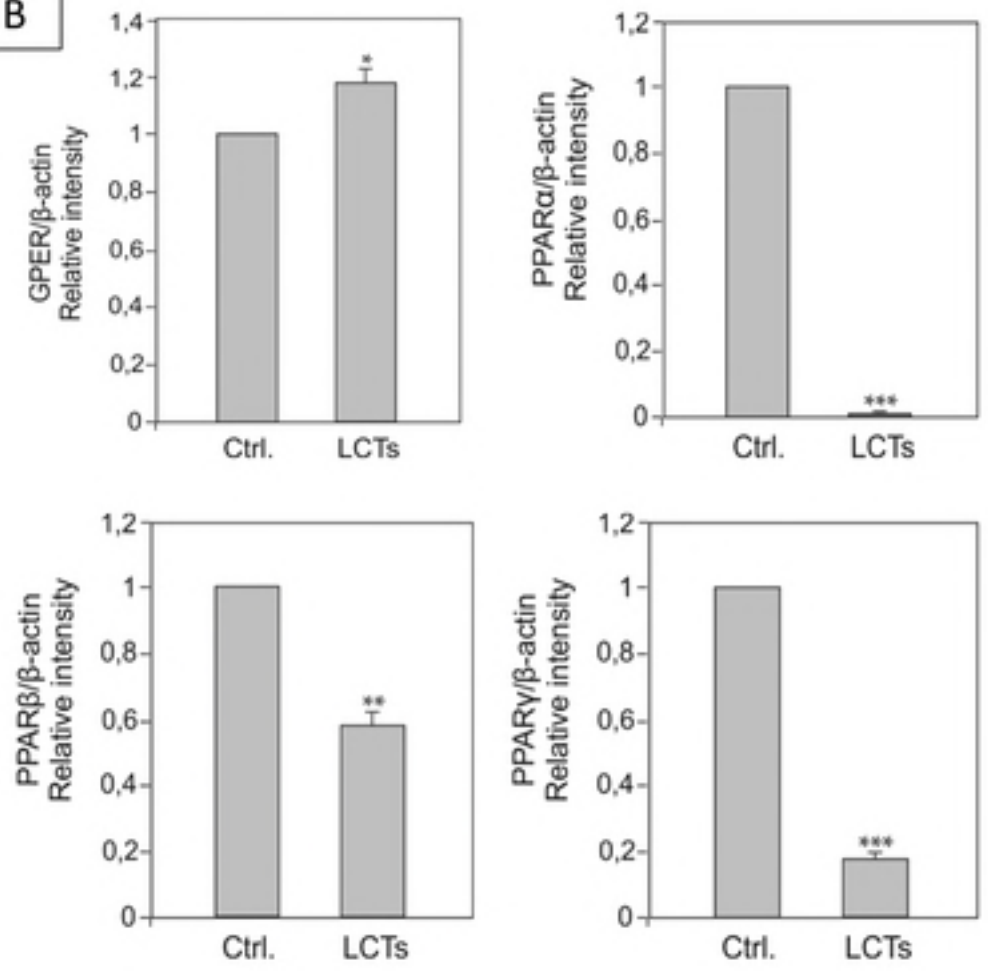

Figure 3

4

Ctrl.

LCTs

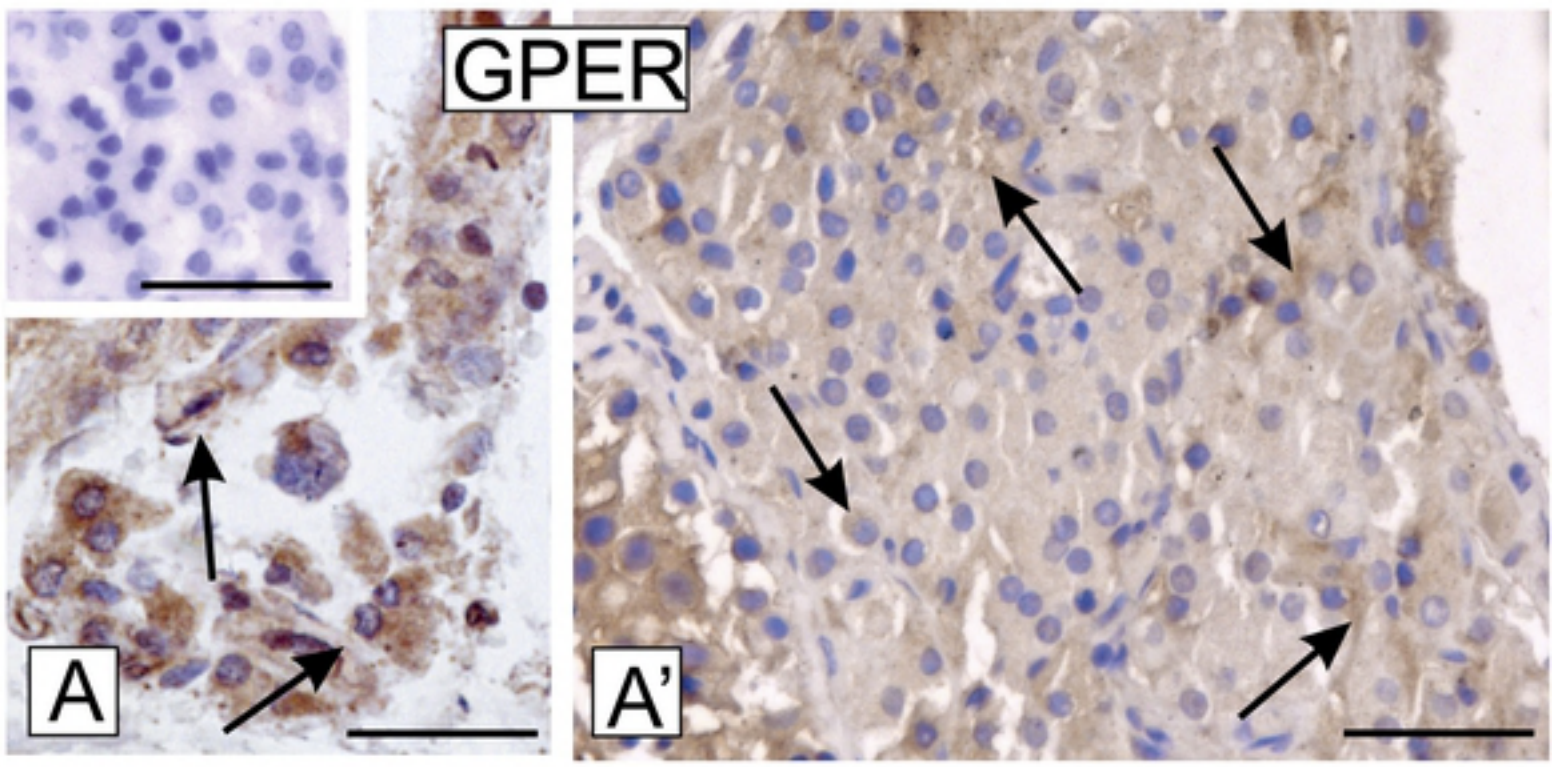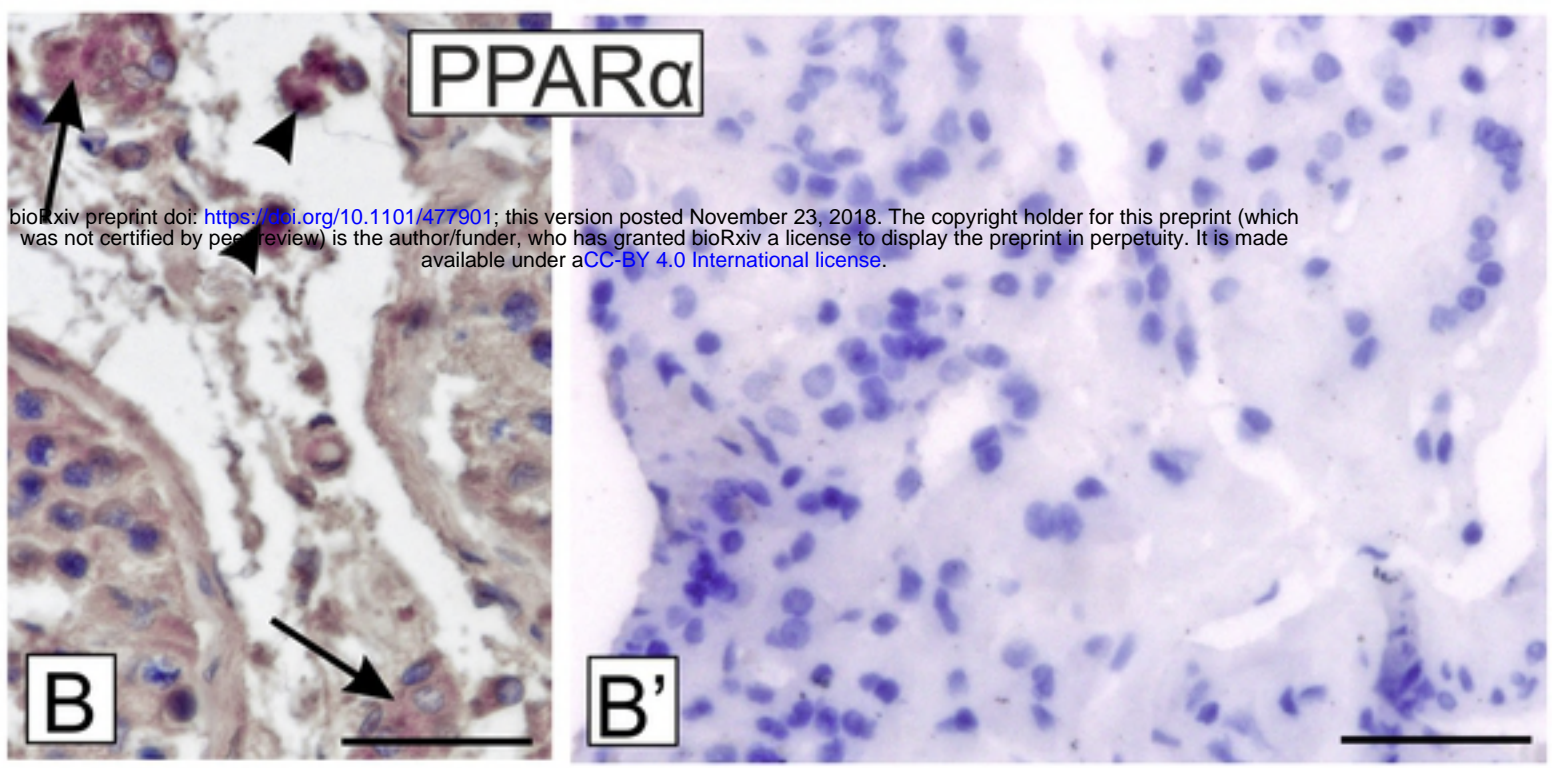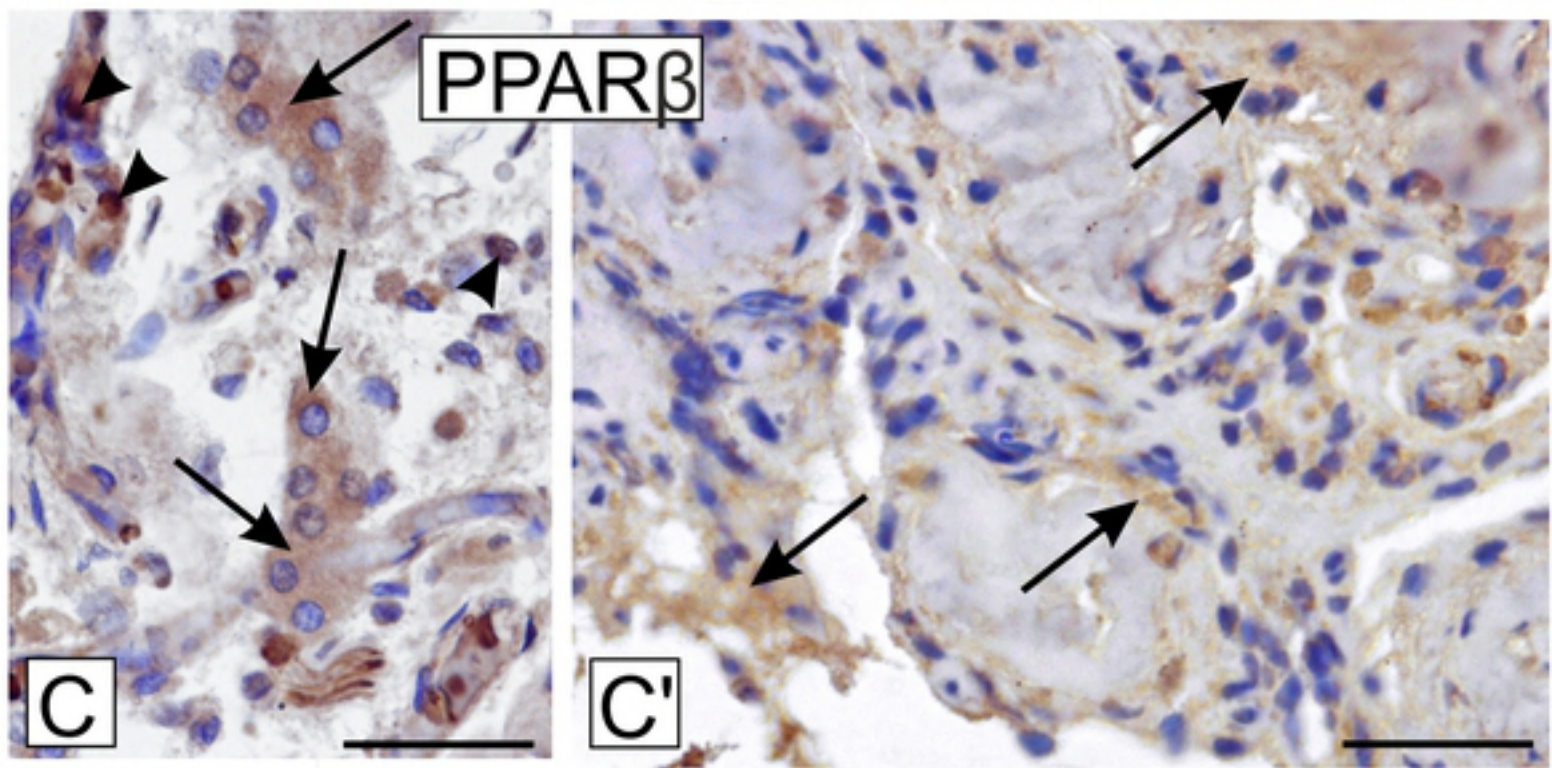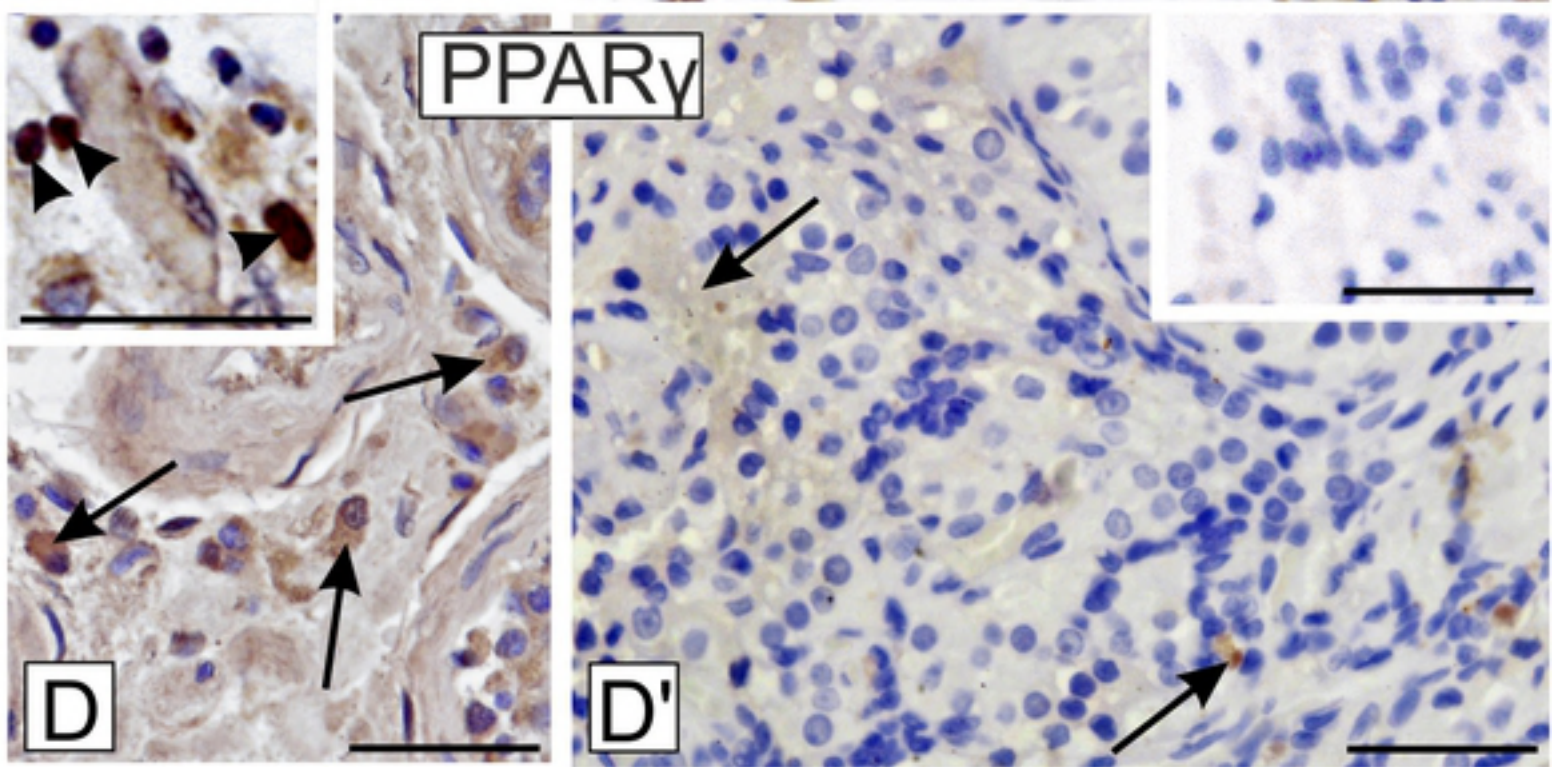

bioRxiv preprint doi: <https://doi.org/10.1101/477901>; this version posted November 23, 2018. The copyright holder for this preprint (which was not certified by peer review) is the author/funder, who has granted bioRxiv a license to display the preprint in perpetuity. It is made available under aCC-BY 4.0 International license.

Figure 4

5.

A

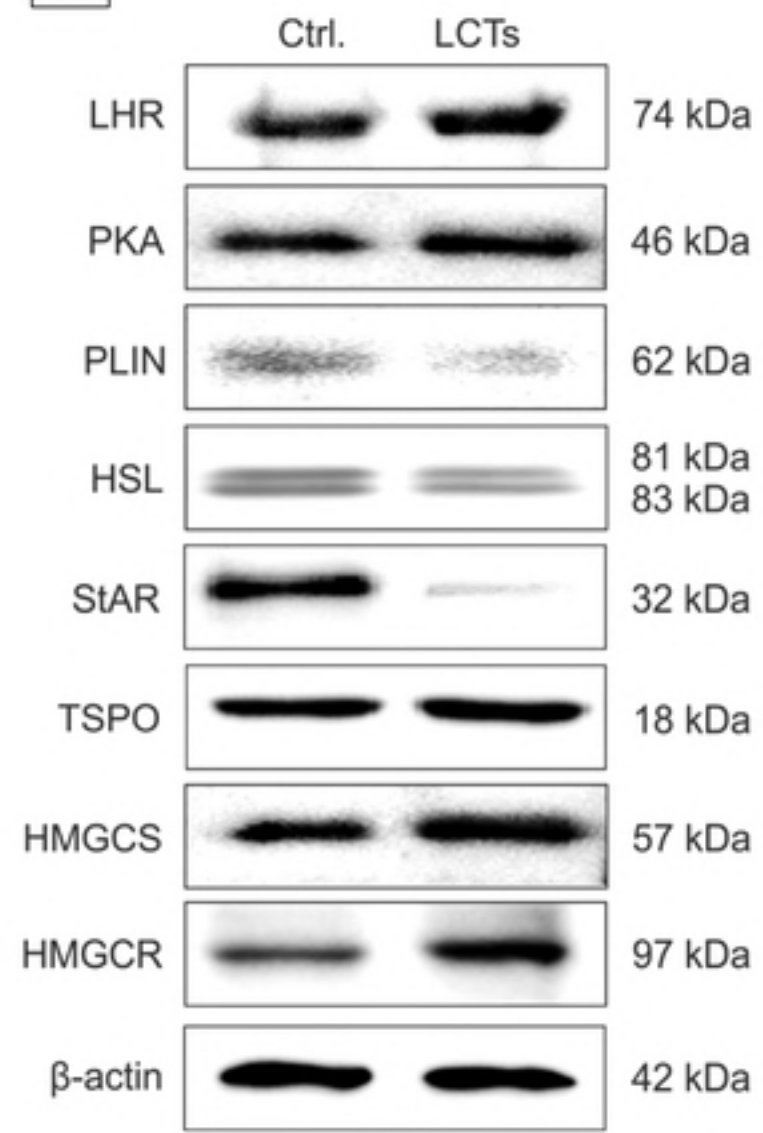

B

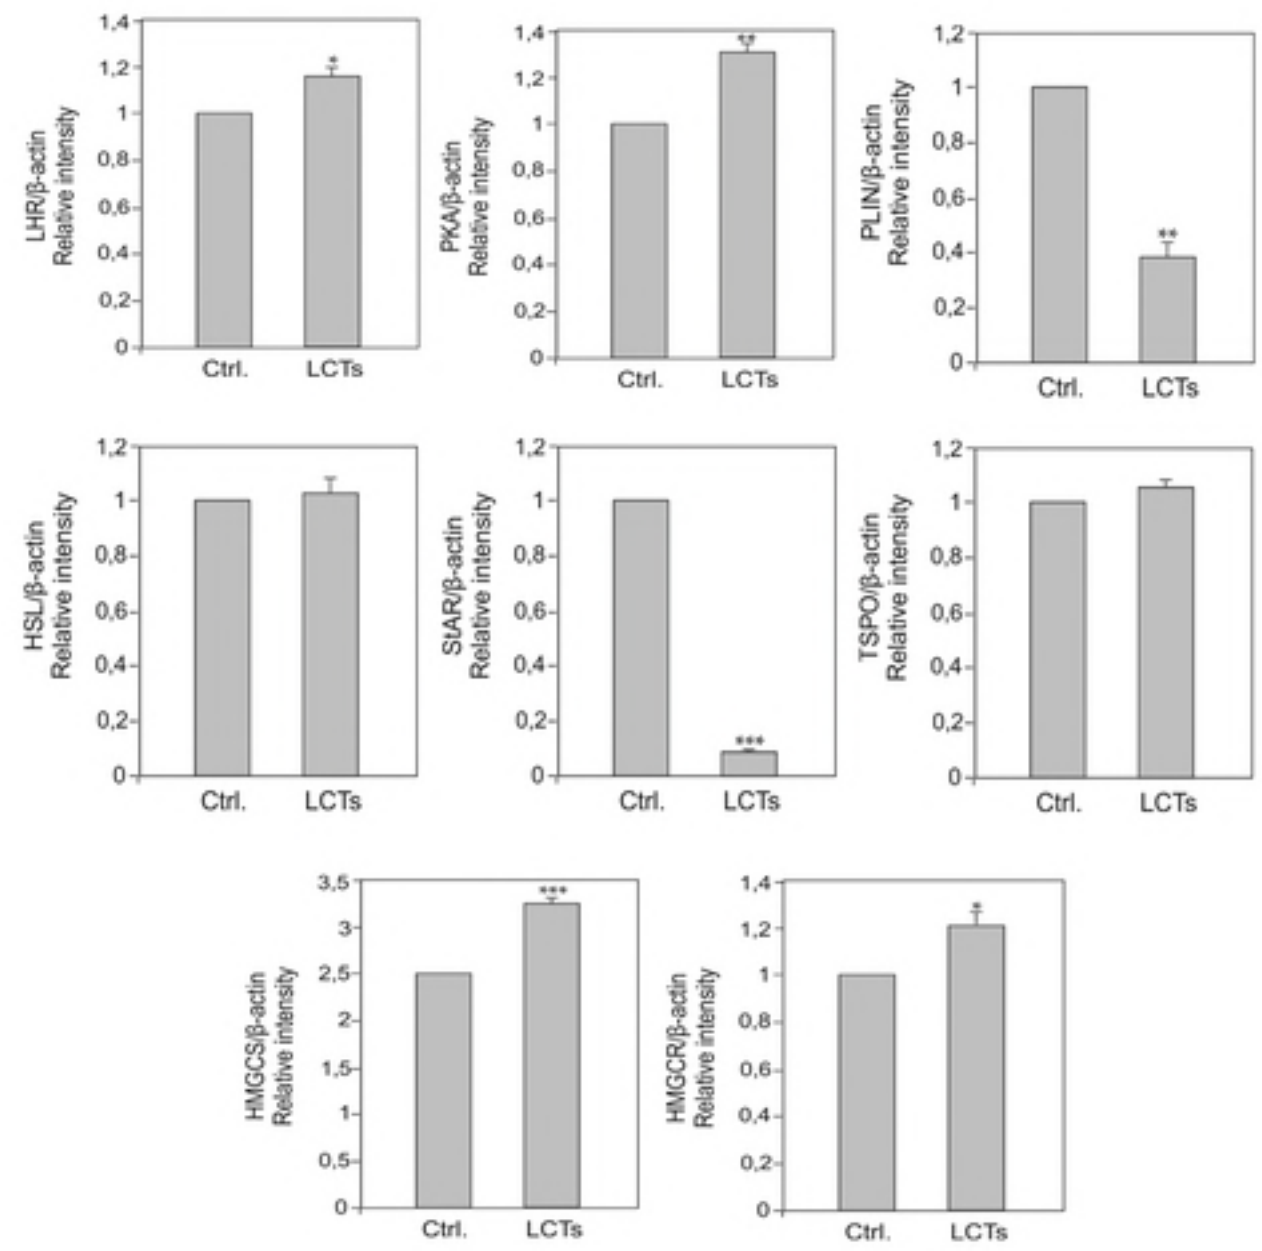

Figure 5

6

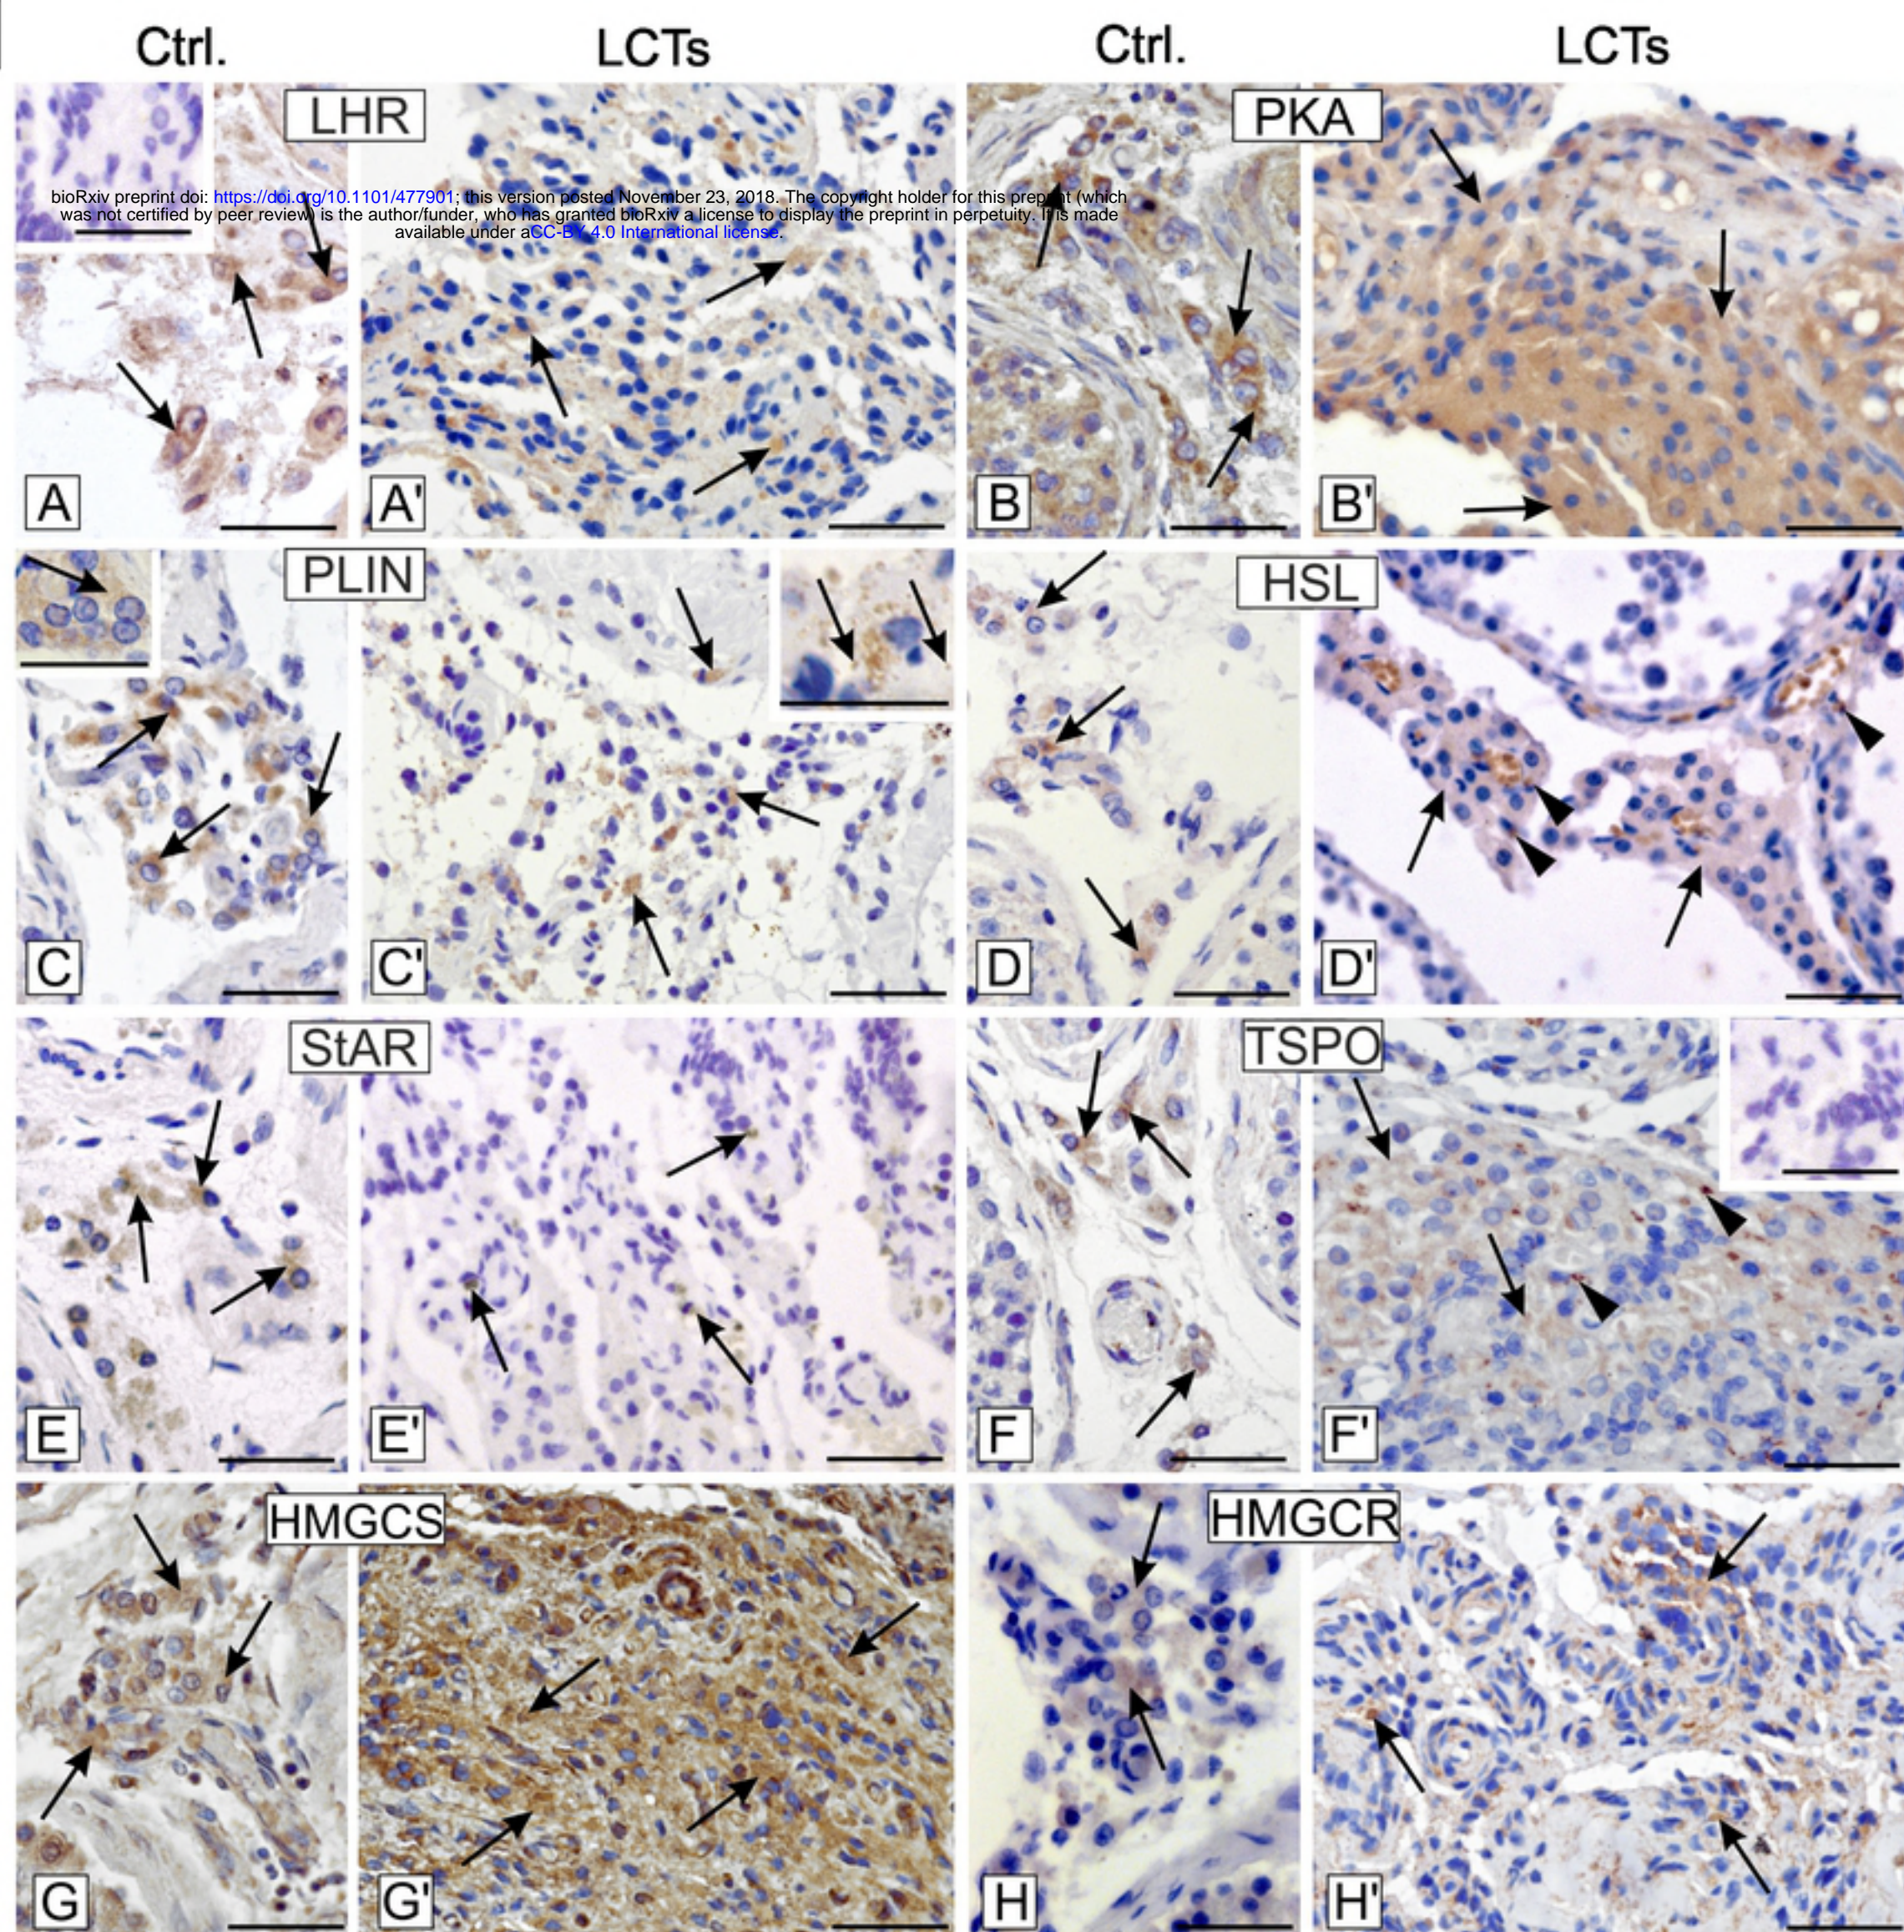

Figure 6

A

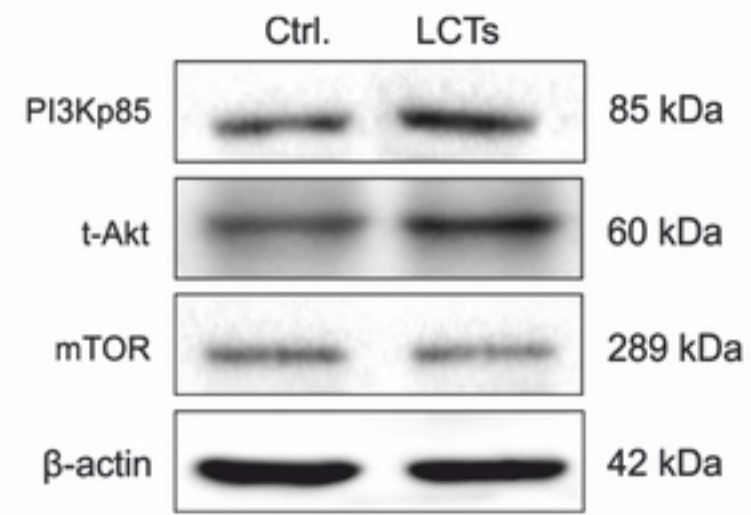

B

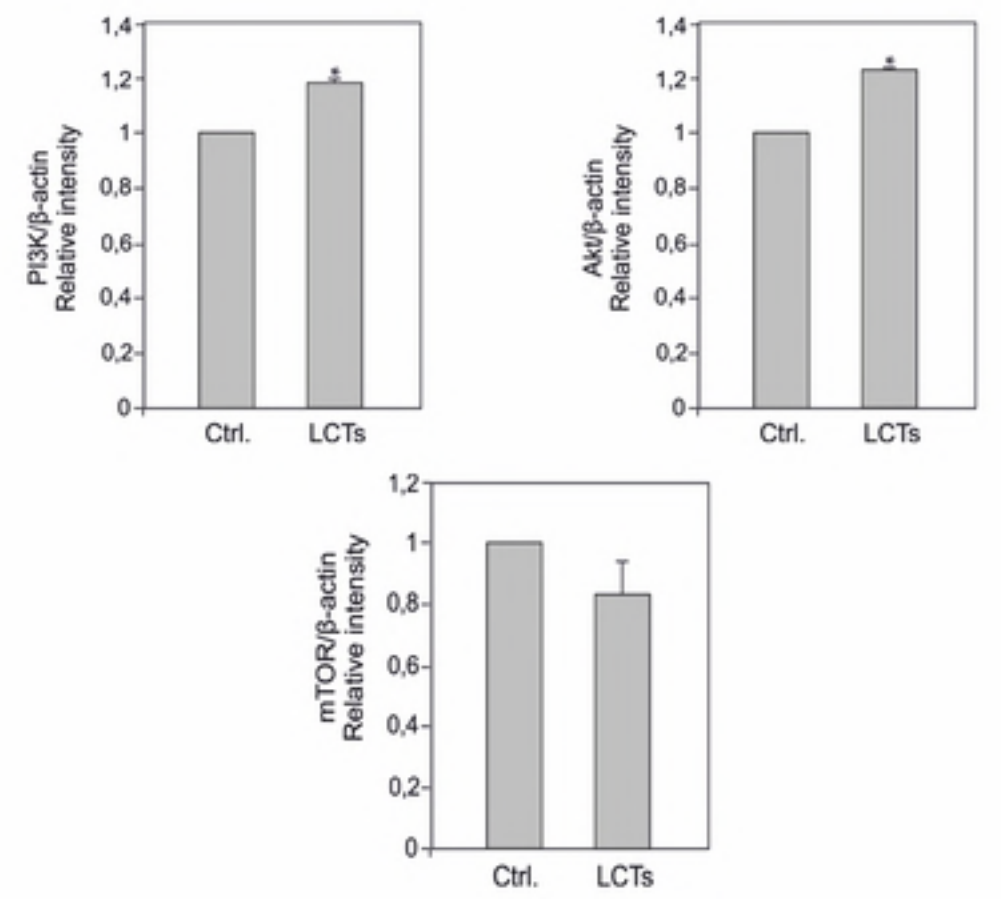

Figure 7

8.

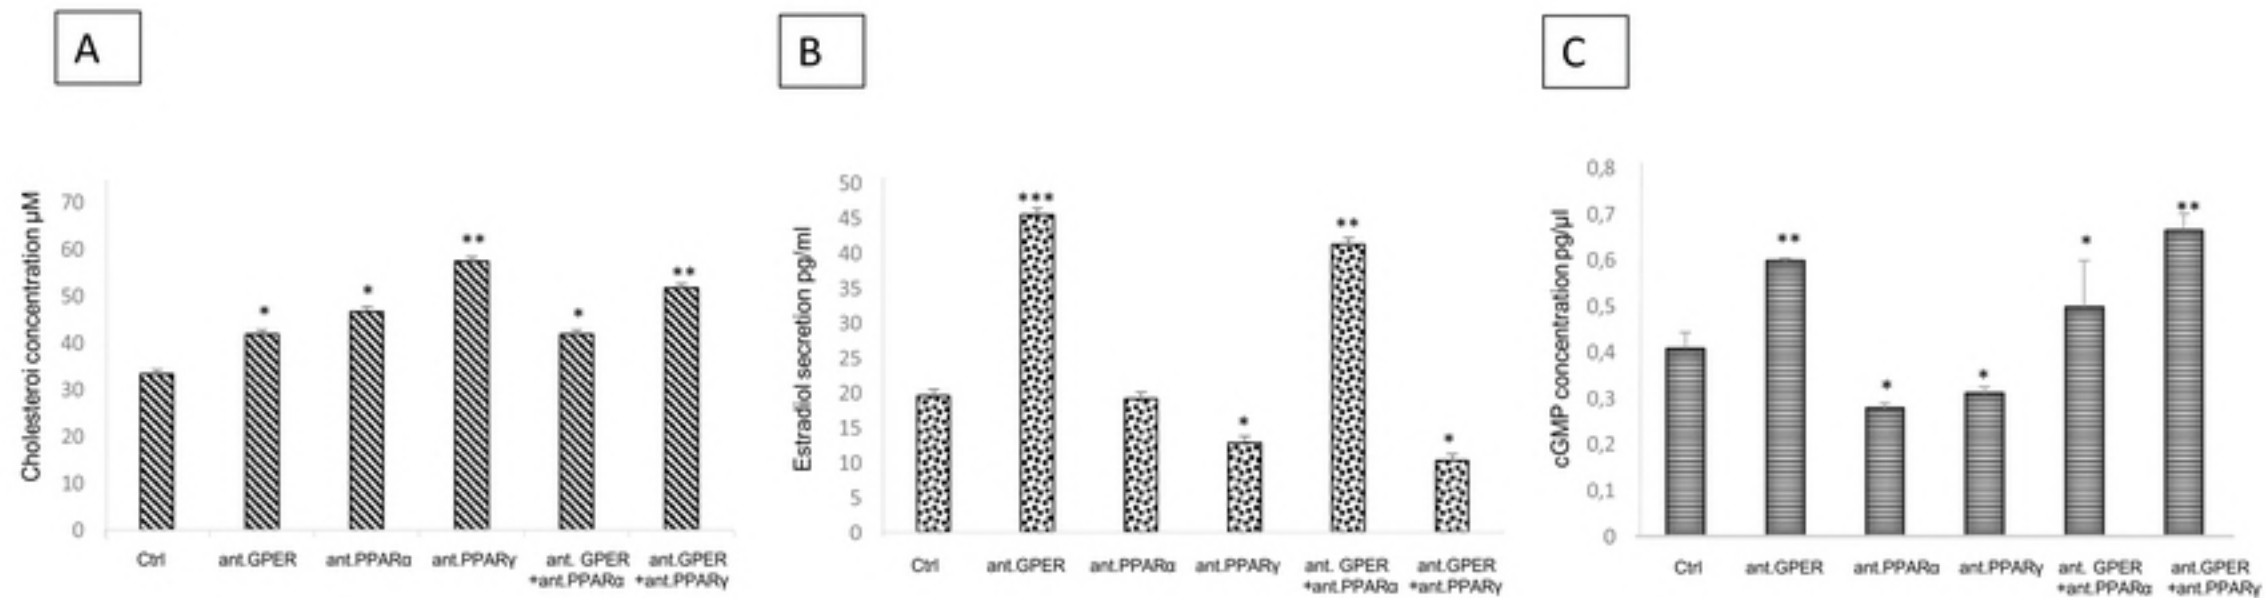

Figure 8



3'

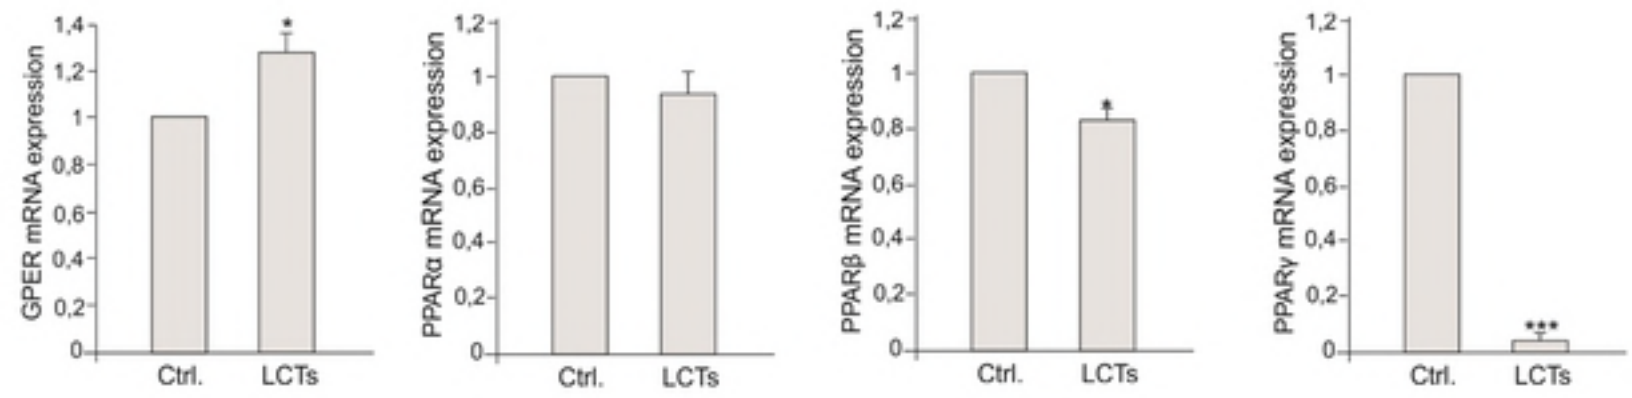

Figure 3prim

5'

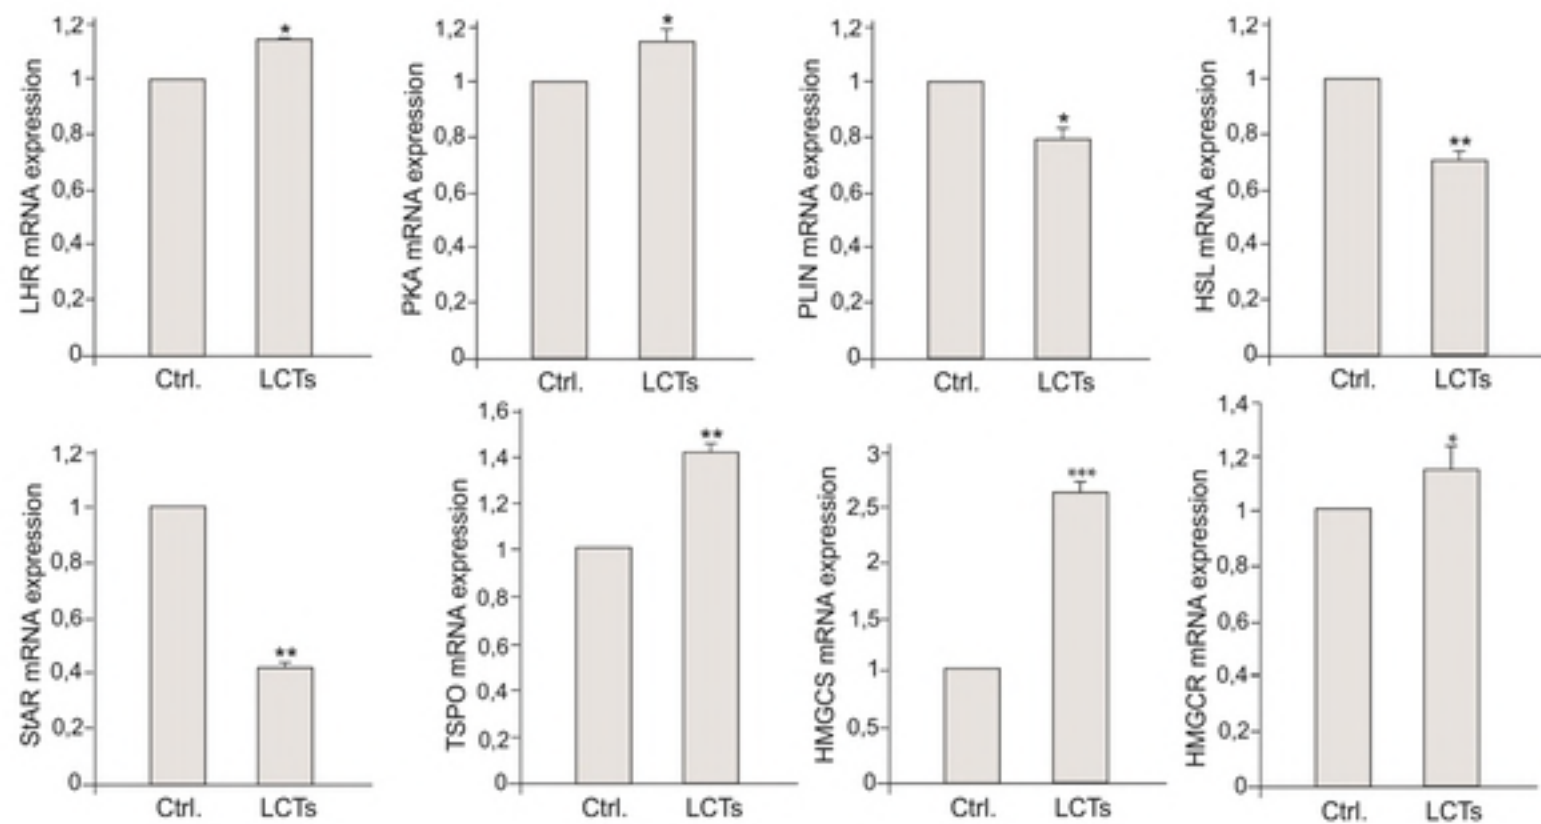

Figure 5prim

7. supplementary

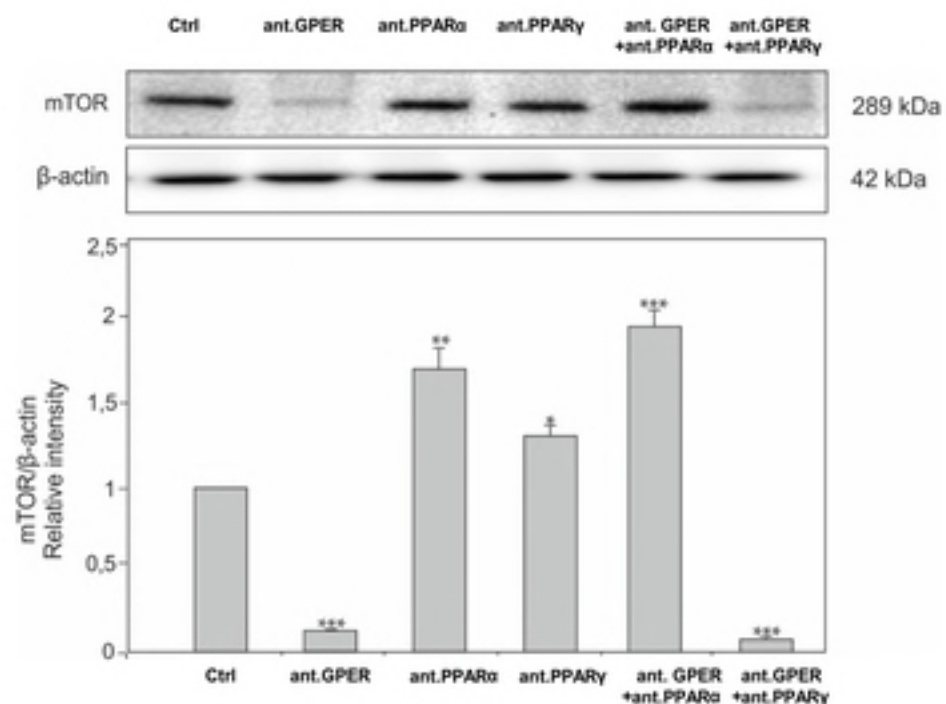

Figure 7prim
